# Supplementary material
Source: Research Square preprint supplement (doi:10.21203/rs.3.rs-9912735/v1)
Supplement: Supplementary file 1 [file 51310df1d34c91ad46f33ca8.pdf]

# Supplementary Information

Cognitive anchoring by large language models accelerates group consensus

Jiapeng Yang<sup>1</sup> Zuhua Jiang<sup>1,\*</sup>

<sup>1</sup>School of Mechanical Engineering, Shanghai Jiao Tong University, Shanghai, China

\*Correspondence: [zhjiang\\_sjtu@126.com](mailto:zhjiang_sjtu@126.com)

## Contents

|    |                                                                                                |           |
|----|------------------------------------------------------------------------------------------------|-----------|
| 5  | <b>1 Supplementary Methods</b>                                                                 | <b>3</b>  |
| 6  | 1.1 Participants, recruitment and ethics . . . . .                                             | 3         |
| 7  | 1.2 Role structure and collaborative task . . . . .                                            | 4         |
| 8  | 1.3 Expert benchmark solution . . . . .                                                        | 5         |
| 9  | 1.4 Design parameters, constraints and scoring mechanism . . . . .                             | 6         |
| 10 | 1.5 Complete scoring formula . . . . .                                                         | 7         |
| 11 | 1.6 Condition-specific interface logic and LLM model version . . . . .                         | 9         |
| 12 | 1.7 Temporal structure, event markers and early termination . . . . .                          | 10        |
| 13 | 1.8 Behavioural data acquisition and harmonisation . . . . .                                   | 12        |
| 14 | 1.9 fNIRS acquisition hardware . . . . .                                                       | 12        |
| 15 | 1.10 Signal preprocessing pipeline . . . . .                                                   | 12        |
| 16 | 1.11 Epoch extraction . . . . .                                                                | 13        |
| 17 | 1.12 ROI aggregation . . . . .                                                                 | 13        |
| 18 | 1.13 Static inter-brain connectivity . . . . .                                                 | 15        |
| 19 | 1.14 Wavelet transform coherence . . . . .                                                     | 16        |
| 20 | 1.15 Hyperbrain network metrics . . . . .                                                      | 17        |
| 21 | 1.16 Dynamic connectivity and hidden Markov modelling . . . . .                                | 19        |
| 22 | 1.17 Statistical analysis pipeline, behavioural convergence and neural-behavioural association | 21        |
| 23 | 1.18 Inferential statistical models and effect sizes . . . . .                                 | 24        |
| 24 | 1.19 Surrogate controls, multiple comparisons and reporting rules . . . . .                    | 26        |
| 25 | <b>Supplementary Figures</b>                                                                   | <b>28</b> |
| 26 | <b>Supplementary Tables</b>                                                                    | <b>29</b> |
| 27 | <b>A Recruitment Notice</b>                                                                    | <b>33</b> |

|    |                                    |           |
|----|------------------------------------|-----------|
| 28 | <b>B Informed Consent Form</b>     | <b>38</b> |
| 29 | <b>C Ethics Approval</b>           | <b>42</b> |
| 30 | <b>D Scoring Parameters</b>        | <b>45</b> |
| 31 | <b>E fNIRS Channel Coordinates</b> | <b>47</b> |

## 1 Supplementary Methods

This Supplementary Information provides implementation details required for the Methods and Results reported in the main text. To keep the main text concise, task parameters, scoring functions, event markers, the LLM condition and model version, fNIRS preprocessing, hyperbrain graph construction, dynamic state models, statistical models and surrogate controls are documented here. Each subsection corresponds to a method or result claim in the main text and expands implementation details rather than repeating the main-text narrative. All analyses were organised using de-identified team, role, round and epoch identifiers. Supplementary Methods Table M1 maps the main-text components to the corresponding Supplementary Information sections. Supplementary Tables 1–4 summarise the behavioural, inferential, neural-fingerprint and robustness results. Appendices A–C provide de-identified English translations of the recruitment, informed-consent and ethics-approval documents; Appendices D–E provide scoring and fNIRS-coordinate reference materials.

**Supplementary Methods Table M1. Main-text and Supplementary Information correspondence.**

| Main-text component                       | Supplementary location                       | Purpose of supplementary expansion                                                                                 |
|-------------------------------------------|----------------------------------------------|--------------------------------------------------------------------------------------------------------------------|
| Participants and ethics                   | Sections 1.1; Appendices A–C                 | Recruitment criteria, consent, ethics approval and de-identified participant documents.                            |
| Task, conditions and procedure            | Sections 1.2–1.7; Appendix D                 | Role structure, expert benchmark solution, scoring function, interface logic, LLM model version and event markers. |
| Behavioural acquisition and preprocessing | Section 1.8                                  | Raw fields, team-level harmonisation, early termination handling and convergence-score construction.               |
| fNIRS acquisition and preprocessing       | Sections 1.9–1.11                            | Hardware, preprocessing formulae and epoch extraction rules.                                                       |
| Hyperbrain modelling and dynamic states   | Sections 1.12–1.16; Appendix E               | ROI mapping, connectivity definitions, graph metrics, WTC and HMM implementation.                                  |
| Statistical analysis and robustness       | Sections 1.17–1.19; Supplementary Tables 1–4 | Mixed models, effect sizes, mediation, surrogate controls and numerical summaries.                                 |

### 1.1 Participants, recruitment and ethics

The analysed sample included 96 participants, organised into 32 three-person teams and assigned to four experimental conditions; each condition contained eight teams. Participants had a mean age of  $24.3 \pm 2.1$  years. The gender distribution was 50 male participants and 46 female participants, corresponding to 52.08% male and 47.92% female. Participants were recruited through questionnaire

51 screening and targeted recruitment from populations with training and practical experience in ship  
52 structural engineering, design aesthetics, environmental engineering or closely related courses.

53 Inclusion criteria were age 18–35 years, ability to communicate in Mandarin, right-handedness,  
54 right-eye dominance, normal or corrected-to-normal vision, and ability to wear an fNIRS cap  
55 throughout the experiment. Main exclusion criteria were scalp inflammation or recent injury,  
56 hairstyles or headwear that substantially impeded probe contact, sensitivity to strong light or screen  
57 flicker, a history of epilepsy, self-reported use of strong sedative or stimulant medication, hierarchical  
58 or intimate relationships with another participant in the same session, and previous participation  
59 in the formal experiment or pilot experiment. Participants received monetary compensation after  
60 completing the task; withdrawals were compensated according to the completed portion. The study  
61 was approved by the Science and Technology Research Ethics Committee for Human Participants  
62 of Shanghai Jiao Tong University (approval number I20250750I), and written informed consent  
63 was obtained from all participants before data acquisition. English translations of the recruitment  
64 materials, informed-consent form and ethics-approval document are provided in Supplementary  
65 Appendices A–C.

## 66 **1.2 Role structure and collaborative task**

67 Each team comprised three participants assigned to complementary perspectives: structure/safety  
68 and performance (S), aesthetics/spatial experience (A), and environment/energy consumption (E).  
69 Role assignment was based on course training, project experience and disciplinary background  
70 reported during recruitment screening, so that every team included members who could reason from  
71 different design constraints. Role labels were kept consistent in task instructions, speaking order,  
72 behavioural records and subsequent inter-brain pair analyses.

73 This role structure was not intended to evaluate the individual performance of the three members  
74 separately. Instead, it constructed a group decision problem that required integration across multiple  
75 constraints. The structural role focused mainly on materials, span, partitions, fire rating and  
76 weight. The aesthetic role focused mainly on finishes, visual richness, spatial openness, window  
77 amount, beam presentation, acoustics and lighting experience. The environmental role focused  
78 mainly on air-conditioning system, recycled-material content, water fixtures, insulation package and  
79 energy-related trade-offs. Because most parameters affected multiple domains at the same time,  
80 the local optimum of one role often impaired other dimensions. For example, increasing spatial  
81 openness could improve experience while increasing structural and energy burdens; increasing fire  
82 protection and insulation could improve safety and environmental performance while increasing cost  
83 or weight. High-scoring solutions therefore required discussion to form a shared cross-role problem  
84 representation.

85 The collaborative task was implemented through a condition-specific browser graphical interface.  
86 In each round, the three members discussed the same set of luxury cruise-ship cabin parameters,  
87 jointly selected a complete solution and submitted it as a team. Task outcomes were recorded  
88 at the team level rather than as individual solutions. Behavioural scores therefore reflected the

89 quality of the team’s consensus solution. The task had a single expert benchmark solution. The  
 90 benchmark solution and scoring rules were calibrated using an expert engineer solution and drew on  
 91 design principles for ship cabin structure, interior spatial quality, environmental engineering and  
 92 safety constraints from *Ship aesthetics and cabin design* [2] and *Research and design of ship cabin*  
 93 *environmental engineering* [3]. The score was not a post hoc subjective rating but a deterministic  
 94 objective function fixed before the experiment.

### 95 1.3 Expert benchmark solution

96 The expert benchmark solution was hidden within the task and defined the target direction for  
 97 “high-quality consensus”. Participants did not see this solution during the experiment. The solution  
 98 balanced structural safety, spatial experience and environmental performance while satisfying cost,  
 99 weight, fire-rating and recycled-material constraints. The benchmark solution and its calculated  
 100 values are listed in Supplementary Methods Table M2; finer cost/weight mappings and itemised  
 101 score contributions are provided in Supplementary Appendix D.

102 **Supplementary Methods Table M2. Expert reference solution used as the hidden task**  
 103 **benchmark.**

| Code   | Parameter                            | Value | Meaning in the benchmark solution   |
|--------|--------------------------------------|-------|-------------------------------------|
| S1     | Main frame material                  | 0.90  | Fibre-reinforced composite          |
| S2     | Column-grid den-<br>sity/span        | 0.00  | Compact-column endpoint             |
| S3     | Deck and partition<br>thickness      | 0.30  | Single-layer integrated panel       |
| A1     | Finish and material                  | 0.30  | Industrial coating                  |
| A2     | Visual richness                      | 0.01  | Near the geometric-minimal endpoint |
| A3     | Spatial openness                     | 0.55  | Moderate openness                   |
| E1     | Air-conditioning sys-<br>tem         | 0.60  | Heat-recovery system                |
| 104 E2 | Recycled-material<br>content         | 0.60  | Mixed recycled material             |
| E3     | Water fixtures                       | 0.90  | Touchless water outlet              |
| SA1    | Window type and<br>amount            | 0.00  | Porthole-series endpoint            |
| SA2    | Beam presentation                    | 0.30  | Hidden integration                  |
| SE1    | Envelope insulation<br>package       | 0.60  | Double-layer insulation             |
| SE2    | Fire rating                          | 0.90  | Enhanced zoning                     |
| AE1    | Acoustic absorption<br>scheme        | 0.60  | Zoned absorption                    |
| AE2    | Lighting (CRI/colour<br>temperature) | 0.30  | Cool-white LED                      |

105 In the formal scoring function, this benchmark solution had cost 704.0 and weight 313.2; therefore  
106 the cost constraint ( $\leq 704$ ), weight constraint ( $\leq 355$ ), fire-rating constraint ( $SE2 \geq 0.9$ ) and  
107 recycled-material constraint ( $E2 \geq 0.6$ ) were all satisfied. None of the six second-order conflict  
108 penalties was triggered, so  $P_1 = \dots = P_6 = 0$ . The corresponding domain scores were structure  
109  $S = 90.35$ , aesthetics  $A = 63.93$  and environment  $E = 80.25$ . The total score was

$$110 \quad T = \frac{90.35 + 63.93 + 80.25}{3} = 78.18. \quad (1)$$

111 Equation 1 was the expert benchmark target under the specified constraints, discrete parameter  
112 levels and 0.01 slider precision, and was not visible to participants.

#### 113 **1.4 Design parameters, constraints and scoring mechanism**

114 The design interface contained 15 adjustable parameters covering structural, aesthetic, envi-  
115 ronmental and cross-domain coupling items. Discrete parameters were represented by three levels,  
116 C/B/A, from low to high or from basic to enhanced. Continuous parameters were represented by  
117 sliders indicating a continuous trade-off between two design endpoints. The complete parameter list  
118 is given in Supplementary Methods Table M3.

119 **Supplementary Methods Table M3. Design parameters and value meanings shown in the task**  
 120 **interface.**

| Code   | Parameter                         | Value meaning                                                                                  |
|--------|-----------------------------------|------------------------------------------------------------------------------------------------|
| S1     | Main frame material               | Hot-rolled steel, quenched-and-tempered alloy steel, fibre-reinforced composite                |
| S2     | Column-grid density/span          | Continuous adjustment from compact column grid to free large span                              |
| S3     | Deck and partition thickness      | Single-layer integrated panel, double-layer hollow construction, multi-layer damping composite |
| A1     | Finish and material               | Industrial coating, natural wood veneer, marble surface                                        |
| A2     | Visual richness                   | Continuous adjustment from geometric minimalism to refined details                             |
| A3     | Spatial openness                  | Continuous adjustment from cellular enclosure to unbounded flow                                |
| E1     | Air-conditioning system           | Constant air volume, heat recovery, demand-driven system                                       |
| 121 E2 | Recycled-material content         | Virgin substrate, mixed recycled material, high-circularity component                          |
| E3     | Water fixtures                    | Constant-flow faucet, flow-limiting cartridge, touchless outlet                                |
| SA1    | Window type and amount            | Continuous adjustment from porthole series to panoramic full-height glazing                    |
| SA2    | Beam presentation                 | Hidden integration, skin wrapping, exposed beam styling                                        |
| SE1    | Envelope insulation package       | Basic insulation, double-layer insulation, continuous air-tightness                            |
| SE2    | Fire rating                       | Flame-retardant coating, fire-resistant integration, enhanced zoning                           |
| AE1    | Acoustic absorption scheme        | Hard reflection, zoned absorption, enveloping absorption                                       |
| AE2    | Lighting (CRI/colour temperature) | Cool-white LED, warm natural lighting, focused scenes                                          |

122 All conditions used the same task parameters, cost/weight mappings, sub-score weights and  
 123 penalty rules. The interface treated cost not exceeding 704, weight not exceeding 355, high fire  
 124 rating ( $SE2 \geq 0.9$ ) and at least medium recycled-material content ( $E2 \geq 0.6$ ) as core compliance  
 125 constraints. The submit button was not blocked by violations, so that group search trajectories were  
 126 retained; however, cost and weight violations entered the total-score penalty, and constraint status  
 127 was displayed to participants at different levels of detail depending on condition.

### 128 1.5 Complete scoring formula

129 Let the complete solution vector be

$$130 \mathbf{p} = (p_{S1}, p_{S2}, p_{S3}, p_{A1}, p_{A2}, p_{A3}, p_{E1}, p_{E2}, p_{E3}, p_{SA1}, p_{SA2}, p_{SE1}, p_{SE2}, p_{AE1}, p_{AE2}). \quad (2)$$

131 Discrete parameters take values in  $\{0.3, 0.6, 0.9\}$ . Continuous slider parameters  $p_{S2}, p_{A2}, p_{A3}, p_{SA1}$   
 132 take values in  $[0, 1]$ , with an interface step of 0.01. Cost and weight are defined as

$$133 \quad C(\mathbf{p}) = \sum_i c_i(p_i), \quad W(\mathbf{p}) = \sum_i w_i(p_i), \quad (3)$$

134 where item-wise mappings  $c_i(\cdot)$  and  $w_i(\cdot)$  are given in Supplementary Appendix D. The hard-  
 135 constraint set is

$$136 \quad C(\mathbf{p}) \leq 704, \quad W(\mathbf{p}) \leq 355, \quad p_{SE2} \geq 0.9, \quad p_{E2} \geq 0.6. \quad (4)$$

137 Equations 2–4 define the design vector, cost–weight bookkeeping and hard compliance constraints  
 138 used by all conditions.

139 The scoring system first computes three unpenalised base scores. The structural base score is

$$140 \quad B_S = 18p_{S1} + 14(1 - p_{S2}) + 16p_{S3} + 8(1 - p_{A1}) + 5(1 - p_{A2}) + 8(1 - p_{A3}) \\
 141 \quad + 4(1 - p_{E1}) + f_S(p_{E2}) + 8(1 - p_{SA1}) + 8(1 - p_{SA2}) + 11p_{SE1} + 12p_{SE2} + 4(1 - p_{AE1}), \quad (5)$$

142 where

$$143 \quad f_S(p_{E2}) = \begin{cases} 7, & p_{E2} = 0.6, \\ 5, & p_{E2} = 0.3, \\ 3, & p_{E2} = 0.9. \end{cases} \quad (6)$$

144 The aesthetic base score is

$$145 \quad B_A = 12p_{S1} + 14p_{S2} + 10(1 - p_{S3}) + 20p_{A1} + 13p_{A2} + 14p_{A3} + 9p_{E1} + 9(1 - p_{E2}) \\
 146 \quad + f_A(p_{E3}) + 13p_{SA1} + 11p_{SA2} + 7(1 - p_{SE1}) + 9(1 - p_{SE2}) + 11p_{AE1} + 9p_{AE2}, \quad (7)$$

147 where

$$148 \quad f_A(p_{E3}) = \begin{cases} 7, & p_{E3} = 0.9, \\ 4, & p_{E3} = 0.3, \\ 2, & p_{E3} = 0.6. \end{cases} \quad (8)$$

149 The environmental base score is

$$150 \quad B_E = 10(1 - p_{S1}) + 6(1 - p_{S2}) + 6(1 - p_{S3}) + 10(1 - p_{A1}) + 5(1 - p_{A2}) + 8(1 - p_{A3}) \\
 151 \quad + 12p_{E1} + 14p_{E2} + 8p_{E3} + 8(1 - p_{SA1}) + 5(1 - p_{SA2}) \\
 152 \quad + 10p_{SE1} + 6p_{SE2} + 6p_{AE1} + 6(1 - p_{AE2}). \quad (9)$$

153 Six second-order conflict penalties are then computed:

$$154 \quad P_1 = \mathbb{I}(p_{SA1} \geq 0.8, p_{SE1} \leq 0.3) 35[p_{SA1}(1 - p_{SE1})]^2, \quad (10)$$

$$155 \quad P_2 = \mathbb{I}(p_{A3} \geq 0.8, p_{S2} \geq 0.7) 35[p_{A3}(1 - p_{S2})]^2, \quad (11)$$

$$156 \quad P_3 = \mathbb{I}(p_{AE2} \geq 0.8, p_{E1} \leq 0.3) 30p_{AE2}(1 - p_{E1}), \quad (12)$$

$$157 \quad P_4 = \mathbb{I}(p_{A1} \geq 0.8, p_{E2} \leq 0.3) 30p_{A1}(1 - p_{E2}), \quad (13)$$

$$158 \quad P_5 = \mathbb{I}(p_{A3} \geq 0.8, p_{AE1} \leq 0.3) 38p_{A3}(1 - p_{AE1}), \quad (14)$$

$$159 \quad P_6 = \mathbb{I}(p_{S2} \geq 0.7, p_{S3} \leq 0.3) 28p_{S2}(1 - p_{S3}). \quad (15)$$

160 These penalties correspond to six engineering trade-offs: large window area with low insulation,  
 161 extreme openness with large span, high scene lighting with low-efficiency air conditioning, high-luxury  
 162 finishes with low recycled-material content, extreme openness with low acoustic absorption, and  
 163 large span with thin partitions.

164 Domain scores are clipped to the 0–100 range:

$$165 \quad S = \text{clip}_{0,100}(B_S - P_2 - P_6), \quad (16)$$

$$166 \quad A = \text{clip}_{0,100}(B_A - P_5), \quad (17)$$

$$167 \quad E = \text{clip}_{0,100}(B_E - P_1 - P_3 - P_4 - P_5), \quad (18)$$

168 where  $\text{clip}_{0,100}(x) = \min[100, \max(0, x)]$ . The total score is the average of the three domain scores,  
 169 with fixed soft penalties for cost and weight overruns:

$$170 \quad T = \text{clip}_{0,100} \left[ \frac{S + A + E}{3} - 0.5 \max(0, C(\mathbf{p}) - 704) - 0.5 \max(0, W(\mathbf{p}) - 355) \right]. \quad (19)$$

171 Equations 5–19 specify the complete scoring rule. Thus, high-scoring solutions must satisfy engineer-  
 172 ing constraints and balance all three objectives; an extreme optimisation of a single dimension cannot  
 173 by itself yield a high score. Participants knew that the task goal was to improve overall solution  
 174 quality, but they did not know the complete scoring function or the expert benchmark solution.

## 175 1.6 Condition-specific interface logic and LLM model version

176 The four conditions shared identical task instructions, role assignment, parameter controls, submit  
 177 button, data-saving logic and fNIRS event-triggering procedure. The experimental manipulation  
 178 changed only the representation of external feedback available to the team in each round.

179 • **G0, no feedback.** Participants interacted only with the design-parameter interface and  
 180 task instructions. The system recorded each submission’s parameters, constraint status and  
 181 score in the background, but did not present round-wise numeric or explanatory feedback to  
 182 participants.

183 • **G1, numeric status feedback.** After submission, participants saw the total score and core

184 constraint status, such as whether cost or weight exceeded the limit, but not the sources of  
185 conflict penalties.

- 186 • **G2, rule-based explanatory feedback.** After submission, participants saw the total score,  
187 constraint status, triggered conflict penalties and trade-off advice generated from fixed rules.
- 188 • **G3, LLM prescriptive feedback.** During the predefined 2-min consultation window before  
189 submission, participants could use an interactive LLM consultation panel to ask questions  
190 about the current solution and receive prescriptive advice on parameter adjustment. After  
191 submission, the same underlying scoring function still recorded the score and constraint status.  
192 The LLM changed only the external cognitive support available to the team, not the task goal,  
193 scoring function or data-recording rules.

194 The manipulation therefore kept the underlying design problem identical across conditions  
195 while isolating the representational level of external feedback, from invisible to numeric, rule-based  
196 explanatory and LLM prescriptive.

197 The G3 consultation system used Qwen3-Max, model version `qwen3-max-2025-09-23`, as the  
198 language model for the AI consultation condition. The implementation called the DashScope  
199 OpenAI-compatible chat-completions endpoint with the model field `qwen3-max` and temperature set  
200 to 0.5.

201 The consultation interface used a fixed system prompt that instructed the model to act as a senior  
202 luxury cruise-cabin design consultant for a team consisting of structural, aesthetic and environmental  
203 roles. The prompt encoded task-domain reference information derived from the cabin-design textbook  
204 references, including parameter meanings, core hard constraints, three-objective score logic and  
205 hidden trade-off penalty rules. The per-query user prompt supplied the current solution state: total  
206 and domain scores, cost, weight, hard-constraint status, current parameter values as JSON and  
207 the team’s natural-language question. The prompt did not include the expert benchmark solution,  
208 complete scoring formula, neural data, participant identity, other teams’ information or post hoc  
209 analysis results.

210 The consultation panel retained the user–AI dialogue in the on-screen session log, giving the  
211 team a visible within-session memory of earlier questions and advice during consultation. This  
212 consultation memory was separate from the hidden benchmark solution and did not allow the model  
213 to access information outside the current team’s interface state. The model output was displayed as  
214 design suggestions rather than as an automatic parameter update; the team still had to discuss and  
215 submit its own solution. The system could not change the deterministic scoring function, directly  
216 submit a solution, observe neural data or access information about other teams.

## 217 **1.7 Temporal structure, event markers and early termination**

218 The experiment contained up to five nominal decision rounds. Before iterative design, all teams  
219 completed a 30-s resting baseline and 5 min of task-material reading. Each nominal round contained  
220 an 8.5-min rest/sequential-discussion window and a 2-min team-decision window; the 8.5-min window

221 consisted of 30 s of rest and up to 8 min of sequential discussion. G1, G2 and G3 also had a 1-min  
222 feedback and reflection-recording window after each round submission, whereas G0 presented no  
223 feedback. After all nominal rounds, teams completed a 1-min final solution confirmation and an  
224 approximately 2-min questionnaire.

225 Sequential discussion was used to control speaking opportunity and role-exposure order. In each  
226 round, participants spoke in the fixed order structure (S) → aesthetics (A) → environment (E).  
227 While one member was speaking, the other members did not interrupt, evaluate or guide by hints.  
228 A single speaking turn was limited to approximately 90 s; if there was no additional point, the  
229 speaker could briefly pass. One speaking cycle consisted of one turn by each of the three members,  
230 and the discussion window ended when time expired and proceeded to group decision. In G3, the  
231 sequential-discussion window was further divided into pre-consultation discussion, 2 min of LLM  
232 consultation and post-consultation discussion, allowing AI consultation to be embedded without  
233 changing the overall within-round structure.

234 Event-marker structure differed by condition.

235 **G0–G2 event structure.** Only three event types were used: mark 1 = rest start, mark 2 = rest  
236 end, and mark 3 = round submission. These conditions contained 17 markers in total, with the  
237 sequence

$$238 \qquad 1-2-1-2-3-1-2-3-1-2-3-1-2-3-1-2-3. \qquad (20)$$

239 The marker sequence in Eq. 20 was used for G0–G2. The first mark1–mark2 interval corresponded  
240 to the pre-task baseline. Each subsequent round contained one rest epoch and one sequential-  
241 discussion/decision epoch. Rounds 1–4 also contained an inter-round interval, which served as a  
242 transition interval in G0 and as a feedback-and-recording epoch in G1 and G2.

243 **G3 event structure.** Five event types were used: mark 1 = rest start, mark 2 = rest end, mark  
244 3 = round submission, mark 4 = AI consultation start and mark 5 = AI consultation end. The  
245 typical within-round sequence was

$$246 \qquad 1-2-4-5-3, \qquad (21)$$

247 corresponding to rest, pre-consultation discussion, AI consultation, post-consultation discussion/team  
248 decision and submission. Equation 21 therefore defines the within-round segmentation used for G3.  
249 The first mark1–mark2 interval again corresponded to the pre-task baseline.

250 **Early termination rule.** All teams were informed in advance that they could jointly request  
251 early termination if they believed the current design was sufficiently good. Under this rule, the final  
252 accepted solution was treated as the solution for the remaining nominal rounds in the behavioural  
253 record. This behavioural carry-forward rule was used only to keep the nominal round-by-team  
254 trajectory matrix complete; neural data and epoch-duration summaries were never carried forward  
255 and were always segmented according to the actually recorded event markers.

## 256 1.8 Behavioural data acquisition and harmonisation

257 Behavioural data were generated automatically by the experimental interface at each round  
258 submission. Each submission record contained 15 design parameters, cost, weight, hard-constraint  
259 violation status, six conflict penalties, structural/aesthetic/environmental sub-scores, total score,  
260 validity flag and submission timestamp. All behavioural records were organised using de-identified  
261 team, role and round identifiers and contained no participant names or contact details.

262 During behavioural harmonisation, submitted solution parameters, constraint status, cost/weight  
263 metrics and score results were first extracted by team, role and round index and then organised into  
264 a long-format table. The harmonised fields included `group`, `triad_id`, `role`, `round`, `total_score`,  
265 `s_score`, `a_score`, `e_score`, `is_valid`, `cost`, `weight` and `is_filled`.

266 The primary behavioural analysis used the team total score in each round as the solution-  
267 quality metric and used structural, aesthetic and environmental sub-scores to describe the domain  
268 composition of solution quality. For the same team and round, the three role-side records were  
269 aggregated into one team-by-round observation after consistency checks. Behavioural convergence  
270 was represented by the linear slope of team total score across nominal rounds. Early termination  
271 was handled according to the predefined rule in Section 1.7; neural analyses still extracted epochs  
272 from the actual event markers.

## 273 1.9 fNIRS acquisition hardware

274 Cortivision Photon Cap (Model C20) and Cortivision Pathfinder software were used to record  
275 cortical haemodynamic activity simultaneously from the three members of each team. The fi-  
276 nal analysis set contained SNIRF records from 32 teams and 96 participants. Acquisition used  
277 two wavelengths, 760 and 850 nm; 26 physical channels per participant; and 52 dual-wavelength  
278 measurement-list entries per SNIRF file. Thus, each team had 78 physical channel time series, and  
279 the full sample contained  $96 \times 26 = 2,496$  participant-by-channel time series and  $96 \times 52 = 4,992$   
280 dual-wavelength measurement series. Optode placement followed the extended 10–5 layout system.  
281 Empirical sampling rates varied slightly across files (5.29–5.62 Hz; mean approximately 5.50 Hz),  
282 and the exact value was read from each SNIRF header during preprocessing.

## 283 1.10 Signal preprocessing pipeline

284 Preprocessing was implemented in Python using MNE-NIRS. For each participant, raw light  
285 intensity  $I_\lambda(t)$  was converted to optical-density change:

$$286 \quad \Delta\text{OD}_\lambda(t) = -\ln \frac{I_\lambda(t)}{I_{\lambda,0}}, \quad (22)$$

287 where  $\lambda \in \{760, 850\}$  nm and  $I_{\lambda,0}$  denotes baseline light intensity. Motion artifacts were corrected  
288 using temporal derivative distribution repair (TDDR), a robust derivative-based algorithm that  
289 suppresses spike-like and baseline-shift artifacts while preserving slower haemodynamic structure [1].

290 TDDR was applied before haemoglobin conversion.

291 Corrected optical density was converted to oxygenated and deoxygenated haemoglobin concen-  
292 tration changes using the modified Beer–Lambert law [4]:

$$293 \begin{pmatrix} \Delta[\text{HbO}](t) \\ \Delta[\text{HbR}](t) \end{pmatrix} = \frac{1}{d} \begin{pmatrix} \varepsilon_{\text{HbO}}^{760} \text{DPF}_{760} & \varepsilon_{\text{HbR}}^{760} \text{DPF}_{760} \\ \varepsilon_{\text{HbO}}^{850} \text{DPF}_{850} & \varepsilon_{\text{HbR}}^{850} \text{DPF}_{850} \end{pmatrix}^{-1} \begin{pmatrix} \Delta\text{OD}'_{760}(t) \\ \Delta\text{OD}'_{850}(t) \end{pmatrix}, \quad (23)$$

294 where  $d$  is the source–detector distance and the differential pathlength factors were fixed as  $\text{DPF}_{760} =$   
295  $\text{DPF}_{850} = 6.0$ . The primary analyses used HbO.

296 Signals were then band-pass filtered between 0.01 and 0.10 Hz using a fourth-order Butterworth  
297 filter:

$$298 x_c(t) = \text{BPF}_{[0.01,0.10] \text{ Hz}}(\Delta[\text{HbO}]_c(t)). \quad (24)$$

299 Equations 22–24 define the full preprocessing transformation from raw light intensity to filtered  
300 HbO signals.

### 301 1.11 Epoch extraction

302 In this study, an epoch denotes a task-phase time window cut from the continuous HbO time  
303 series according to event markers. It is the basic analysis unit for ROI aggregation, inter-brain  
304 connectivity estimation and dynamic state modelling. Each epoch corresponded to a clearly defined  
305 experimental phase, such as rest, discussion, feedback, AI consultation or post-consultation decision.

306 Continuous HbO signals were segmented using corrected event-marker files. Event markers  
307 were first extracted from SNIRF records and checked according to the condition-specific sequences  
308 described in Section 1.7. Occasional duplicate, missing or out-of-order markers were corrected using  
309 predefined sequence rules and synchronous recordings from the same team. Correction decisions  
310 were made before neural connectivity analysis and used only event-order rules and same-session  
311 synchronous team recordings, not behavioural scores or neural synchrony outcomes. Corrected  
312 markers were used to extract within-round phases for each condition: G0–G2 included rest and  
313 discussion phases, G1 and G2 also included feedback phases, and G3 included rest, pre-consultation  
314 discussion, AI consultation and post-consultation decision phases. Epoch metadata included round  
315 number, phase label, start time, end time and sample count.

### 316 1.12 ROI aggregation

317 This section corresponds to the main-text ROI-aggregation subsection under “Hyperbrain  
318 modelling and dynamic-state definitions” and provides implementation details for ROI-related  
319 symbols in the main-text notation table. The main text reports only the ROI aggregation principle  
320 and a summary of channel–ROI mapping. This section supplements channel localisation, functional  
321 ROI grouping rules, weight definitions and output data structures. The correspondence between  
322 the modelling components in the main text and the Supplementary Information is summarised in  
323 Supplementary Methods Table M4.

324 **Supplementary Methods Table M4. Main-text modelling components and their Supplementary**  
 325 **Information locations.**

|     | <b>Main-text modelling component</b>         | <b>Supplementary location</b> | <b>Supplementary content</b>                                                                                                            |
|-----|----------------------------------------------|-------------------------------|-----------------------------------------------------------------------------------------------------------------------------------------|
|     | Unified notation                             | Sections 1.12–1.16            | Concrete meanings of derived symbols and implementation parameters in each modelling step.                                              |
|     | ROI aggregation                              | Section 1.12 and Appendix E   | Channel MNI coordinates, AAL3 mapping, functional ROI grouping and weighted channel aggregation.                                        |
| 326 | Hyperbrain graph construction                | Section 1.15                  | 21-node hyperbrain graph, 147 inter-brain edges, block adjacency matrix, homologous/complementary edge sets and graph metrics.          |
|     | Inter-brain synchrony metrics                | Sections 1.13–1.15            | Pearson-Fisher- $z$ synchrony, WTC frequency-specific synchrony and summary metrics including GS, HS and CS.                            |
|     | Dynamic connectivity and neural fingerprints | Section 1.16                  | Sliding-window connectivity vectors, PCA reduction, HMM state estimation, neural-fingerprint back-projection and dynamic state metrics. |

327 Channel coordinates were located in MNI standard space and mapped to the AAL3 atlas according  
 328 to fNIRS spatial-registration methods [5, 6, 7, 8]. AAL3 labels were used for anatomical localisation,  
 329 and Brodmann areas (BAs) were used to report regional attributes. The main analyses did not model  
 330 single AAL3 regions directly; instead, adjacent and functionally related channels were grouped into  
 331 seven functional regions of interest (ROIs): frontopolar area (FPA), dorsolateral prefrontal cortex  
 332 (DLPFC), medial prefrontal cortex (mPFC), middle temporal gyrus (MTG), superior temporal gyrus  
 333 (STG), primary somatosensory cortex (S1) and supramarginal gyrus (SMG). Each channel’s MNI  
 334 coordinates, AAL3 label and BA mapping are listed in Supplementary Appendix E. The channel  
 335 sets for the seven ROIs are shown in Supplementary Methods Table M5.

336 **Supplementary Methods Table M5. ROI channel sets used for functional aggregation.**

|     | <b>ROI</b> | <b>No. channels</b> | <b>Channel set <math>C_k</math></b>                                                     |
|-----|------------|---------------------|-----------------------------------------------------------------------------------------|
|     | FPA        | 8                   | Fpz_Fp1, Fpz_Fp2, AF3_Fp1, AF3_Afz, AF4_Afz, AF4_Fp2, F3_F1, Fz_F1                      |
|     | DLPFC      | 9                   | AF7_Fp1, AF8_Fp2, AF7_AFF5h, AF3_AFF5h, AF4_AFF6h, AF8_AFF6h, F3_AFF5h, F4_F2, F4_AFF6h |
| 337 | mPFC       | 2                   | Fpz_Afz, Fz_F2                                                                          |
|     | MTG        | 4                   | FTT9h_T7, TTP7h_T7, FTT9h_FT7, FTT7h_T7                                                 |
|     | STG        | 1                   | FTT7h_FT7                                                                               |
|     | S1         | 1                   | FTT7h_C5                                                                                |
|     | SMG        | 1                   | TTP7h_C5                                                                                |

338 Let  $x_{g,m,c,e}(t)$  denote the preprocessed HbO time series of member  $m$  in team  $g$ , physical channel  
 339  $c$ , epoch  $e$ , and let  $\mathcal{C}_k$  denote the channel set mapped to ROI  $k$ . For an ROI containing multiple  
 340 channels, channel time series were aggregated using amplitude-to-variability weights:

$$341 \quad x_{g,m,k,e}(t) = \frac{\sum_{c \in \mathcal{C}_k} w_{g,m,c,e} x_{g,m,c,e}(t)}{\sum_{c \in \mathcal{C}_k} w_{g,m,c,e}}, \quad (25)$$

342 where

$$343 \quad w_{g,m,c,e} = \frac{\overline{|x_{g,m,c,e}|}}{\sigma(x_{g,m,c,e})}. \quad (26)$$

344 In Eq. 26,  $\overline{|x_{g,m,c,e}|}$  denotes the mean absolute amplitude of the channel in the current epoch,  
 345 and  $\sigma(x_{g,m,c,e})$  denotes the channel standard deviation in that epoch. The weight determines  
 346 only the relative contribution of channels within the same member, epoch and ROI, and does  
 347 not enter subsequent statistical models. For single-channel ROIs,  $x_{g,m,k,e}(t)$  is directly equal to  
 348 the corresponding channel time series. The output of Eq. 25 is seven ROI HbO time series for  
 349 each participant and each epoch, which serve as the input to all connectivity analyses in Sections  
 350 1.13–1.16.

### 351 1.13 Static inter-brain connectivity

352 This section corresponds to the Pearson-Fisher- $z$  synchrony definition in the main-text inter-brain  
 353 synchrony subsection and provides the basis for the hyperbrain graph edge weights in Section 1.15.  
 354 Static inter-brain connectivity refers to linear temporal coupling between two members' ROI time  
 355 series over a complete epoch. For team  $g$ , epoch  $e$ , member pair  $(m, n) \in \mathcal{P}$  and ROI pair  $(i, j)$ ,  
 356 Pearson correlation is defined as

$$357 \quad \rho_{ij,g,e}^{(m,n)} = \frac{\sum_{t \in e} (x_{g,m,i,e}(t) - \bar{x}_{g,m,i,e})(x_{g,n,j,e}(t) - \bar{x}_{g,n,j,e})}{\sqrt{\sum_{t \in e} (x_{g,m,i,e}(t) - \bar{x}_{g,m,i,e})^2} \sqrt{\sum_{t \in e} (x_{g,n,j,e}(t) - \bar{x}_{g,n,j,e})^2}}, \quad (27)$$

358 where  $\bar{x}_{g,m,i,e}$  is the temporal mean of ROI  $i$  for member  $m$  in epoch  $e$ . The correlation coefficient  
 359 was then Fisher- $z$  transformed:

$$360 \quad Z_{ij,g,e}^{(m,n)} = \operatorname{arctanh}(\rho_{ij,g,e}^{(m,n)}) = \frac{1}{2} \ln \frac{1 + \rho_{ij,g,e}^{(m,n)}}{1 - \rho_{ij,g,e}^{(m,n)}}. \quad (28)$$

361 In implementation, zero-variance ROI series were handled by denominator protection before the  
 362 Pearson calculation, and correlation coefficients were clipped to  $[-0.9999, 0.9999]$  before applying  
 363 Eq. 28. This kept the Fisher- $z$  transform finite without changing the definition of the metric for  
 364 ordinary non-boundary correlations.

365 The member-pair set was fixed as

$$366 \quad \mathcal{P} = \{(A, S), (A, E), (S, E)\}. \quad (29)$$

367 This pair order was used consistently in stored matrices and dynamic-connectivity vectors. Thus,  
 368 each team in each epoch yielded three  $7 \times 7$  inter-brain connectivity matrices:

$$369 \quad \mathbf{Z}_{g,e}^{mn} = \left[ Z_{ij,g,e}^{(m,n)} \right]_{i,j=1}^7, \quad (m, n) \in \mathcal{P}. \quad (30)$$

370 Equations 27–30 define the static Fisher- $z$  connectivity matrices used by the hyperbrain graph.  
 371 Each matrix contained 49 ROI–ROI inter-brain edges, yielding 147 inter-brain edges across the  
 372 three member pairs. Edges with  $i = j$  were defined as homologous edges, and edges with  $i \neq j$   
 373 as complementary edges. Fisher- $z$  edge weights retained the sign of synchrony; strength metrics  
 374 such as GS, HS and CS used absolute values to measure coupling magnitude rather than positive or  
 375 negative direction.

376 In addition to inter-brain edges, the cognitive-offloading analysis used individual DLPFC HbO  
 377 amplitude as a within-brain prefrontal-load metric. For member  $m$ , DLPFC load was defined as the  
 378 mean absolute HbO amplitude of the DLPFC ROI during the corresponding phase:

$$379 \quad L_{g,m,e}^{\text{DLPFC}} = \frac{1}{|T_e|} \sum_{t \in e} |x_{g,m,\text{DLPFC},e}(t)|, \quad (31)$$

380 where  $|T_e|$  is the number of time points in the epoch. Equation 31 is not a hyperbrain graph edge  
 381 weight; it is used for the mechanistic comparison between inter-brain synchrony and within-brain  
 382 load in the main-text cognitive-alignment/offloading analysis.

### 383 1.14 Wavelet transform coherence

384 This section corresponds to the second of the two complementary synchrony metrics in the  
 385 main-text inter-brain synchrony subsection. Pearson-Fisher- $z$  connectivity quantifies broadband  
 386 temporal correlation over the whole epoch, whereas wavelet transform coherence (WTC) evaluates  
 387 whether synchrony is also observable in task-related low-frequency oscillations [9]. The frequency  
 388 band was predefined as 0.02–0.05 Hz, consistent with low-frequency ranges used in fNIRS analyses  
 389 of social interaction and task-related haemodynamic oscillations.

390 The implementation used a complex Morlet continuous wavelet transform with the `cmor1.5-1.0`  
 391 wavelet and scales corresponding to 0.02–0.05 Hz. For two ROI time series  $x(t)$  and  $y(t)$ , let  
 392  $W_x(s, \tau)$  and  $W_y(s, \tau)$  be their wavelet transforms, where  $s$  is scale and  $\tau$  is temporal position. The  
 393 cross-wavelet spectrum is

$$394 \quad W_{xy}(s, \tau) = W_x(s, \tau) W_y^*(s, \tau), \quad (32)$$

395 where  $*$  denotes complex conjugation. Squared wavelet coherence is defined as

$$396 \quad R_{xy}^2(s, \tau) = \frac{|G_t(W_{xy}(s, \tau))|^2}{G_t(|W_x(s, \tau)|^2) G_t(|W_y(s, \tau)|^2)}, \quad (33)$$

397 where  $G_t(\cdot)$  denotes Gaussian smoothing along the temporal dimension, using a standard deviation  
 398 of  $\max(1, \lfloor 3f_s \rfloor)$  samples for sampling rate  $f_s$ . Zero denominators were replaced by 1 before division.

399 Let  $\mathcal{S}_{0.02-0.05}$  be the scale set corresponding to 0.02–0.05 Hz and let  $\mathcal{T}_e$  be the retained time points  
 400 in epoch  $e$ . The epoch-level WTC synchrony for member pair  $(m, n)$  and ROI pair  $(i, j)$  is

$$401 \quad C_{ij,g,e}^{(m,n)} = \frac{1}{|\mathcal{T}_e| |\mathcal{S}_{0.02-0.05}|} \sum_{\tau \in \mathcal{T}_e} \sum_{s \in \mathcal{S}_{0.02-0.05}} R_{ij,g,e}^{2,(m,n)}(s, \tau). \quad (34)$$

402 Equations 32–34 define the WTC synchrony pipeline.  $C_{ij,g,e}^{(m,n)}$  ranges from 0 to 1, with larger values  
 403 indicating stronger coherence in the corresponding band. WTC matrices have the same member-pair  
 404 and ROI-pair structure as Pearson-Fisher- $z$  matrices; they can therefore be summarised using the  
 405 same graph structure in Section 1.15 to obtain WTC versions of GS, HS and CS. Because WTC is a  
 406 non-negative coherence metric, no Fisher- $z$  transformation was applied to WTC summaries.

### 407 1.15 Hyperbrain network metrics

408 This section corresponds to the main-text hyperbrain graph and synchrony-metric subsections and  
 409 supplements the block-matrix representation of the hyperbrain graph, homologous/complementary  
 410 edge sets and graph-metric calculations. Each team in each epoch was represented as a weighted  
 411 undirected hyperbrain graph:

$$412 \quad \mathcal{G}_{g,e} = (\mathcal{V}_{g,e}, \mathcal{E}_{g,e}, \mathbf{B}_{g,e}). \quad (35)$$

413 The node set was the Cartesian product of members and ROIs:

$$414 \quad \mathcal{V}_{g,e} = \mathcal{M} \times \mathcal{K}, \quad \mathcal{M} = \{A, S, E\}, \quad \mathcal{K} = \{1, \dots, 7\}, \quad |\mathcal{V}_{g,e}| = 21. \quad (36)$$

415 The edge set contained only inter-brain edges between different members:

$$416 \quad \mathcal{E}_{g,e} = \{((m, i), (n, j)) : (m, n) \in \mathcal{P}, i, j \in \mathcal{K}\}, \quad |\mathcal{E}_{g,e}| = 147. \quad (37)$$

417 Equations 35–37 define the 21-node, 147-edge hyperbrain graph. Within-member ROI–ROI correla-  
 418 tions did not enter the hyperbrain graph edge set, so graph metrics reflected inter-brain synchrony  
 419 only.

420 If nodes were ordered as  $(A, 1), \dots, (A, 7), (S, 1), \dots, (S, 7), (E, 1), \dots, (E, 7)$ , the block adjacency  
 421 matrix was

$$422 \quad \mathbf{B}_{g,e} = \begin{pmatrix} \mathbf{0} & \mathbf{Z}_{g,e}^{AS} & \mathbf{Z}_{g,e}^{AE} \\ (\mathbf{Z}_{g,e}^{AS})^\top & \mathbf{0} & \mathbf{Z}_{g,e}^{SE} \\ (\mathbf{Z}_{g,e}^{AE})^\top & (\mathbf{Z}_{g,e}^{SE})^\top & \mathbf{0} \end{pmatrix}. \quad (38)$$

423 The diagonal blocks were fixed at zero because they corresponded to within-person rather than inter-  
 424 brain connections. The off-diagonal blocks were formed from the Fisher- $z$  inter-brain connectivity  
 425 matrices defined in Section 1.13.

426 The homologous and complementary edge sets were defined as

$$427 \quad \mathcal{E}_{g,e}^H = \{((m, i), (n, i)) : (m, n) \in \mathcal{P}, i \in \mathcal{K}\}, \quad |\mathcal{E}_{g,e}^H| = 21, \quad (39)$$

$$428 \quad \mathcal{E}_{g,e}^C = \{((m, i), (n, j)) : (m, n) \in \mathcal{P}, i, j \in \mathcal{K}, i \neq j\}, \quad |\mathcal{E}_{g,e}^C| = 126. \quad (40)$$

429 Global strength, homologous strength and complementary strength were defined as

$$430 \quad \text{GS}_{g,e} = \frac{1}{147} \sum_{(m,n) \in \mathcal{P}} \sum_{i=1}^7 \sum_{j=1}^7 |Z_{ij,g,e}^{(m,n)}|, \quad (41)$$

$$431 \quad \text{HS}_{g,e} = \frac{1}{21} \sum_{(m,n) \in \mathcal{P}} \sum_{i=1}^7 |Z_{ii,g,e}^{(m,n)}|, \quad (42)$$

$$432 \quad \text{CS}_{g,e} = \frac{1}{126} \sum_{(m,n) \in \mathcal{P}} \sum_{i \neq j} |Z_{ij,g,e}^{(m,n)}|. \quad (43)$$

433 Equations 38–41 specify the matrix representation and the three global edge-category summaries  
434 used in the main text.

435 Pair-specific strength was used to describe the average synchrony of a particular member pair:

$$436 \quad \text{PS}_{g,e}^{(m,n)} = \frac{1}{49} \sum_{i=1}^7 \sum_{j=1}^7 |Z_{ij,g,e}^{(m,n)}|. \quad (44)$$

437 Node strength was used to describe the total connection strength of a particular member's ROI in  
438 the hyperbrain graph:

$$439 \quad \text{NS}_{g,e}^{(m,i)} = \frac{1}{14} \sum_{\substack{n \in \mathcal{M} \\ n \neq m}} \sum_{j=1}^7 |\mathbf{B}_{g,e}[(m, i), (n, j)]|. \quad (45)$$

440 ROI-specific DLPFC inter-brain synchrony was defined as the average homologous DLPFC–DLPFC  
441 edge across the three member pairs:

$$442 \quad \text{IBS}_{g,e}^{\text{DLPFC}} = \frac{1}{3} \sum_{(m,n) \in \mathcal{P}} |Z_{\text{DLPFC,DLPFC},g,e}^{(m,n)}|. \quad (46)$$

443 Equations 44–46 define secondary summaries used for member-pair, node-level and DLPFC-specific  
444 analyses.

445 To make phase meaning comparable in cross-condition analyses, G3 pre-consultation discussion  
446 and post-consultation decision were merged into a discussion-equivalent phase. For any metric  $M$ ,  
447 the merging rule was a duration-weighted average:

$$448 \quad M_{\text{disc.eq}} = \frac{d_{\text{pre}} M_{\text{pre}} + d_{\text{post}} M_{\text{post}}}{d_{\text{pre}} + d_{\text{post}}}, \quad (47)$$

449 where  $d_{\text{pre}}$  and  $d_{\text{post}}$  are the durations of the pre-consultation discussion and post-consultation  
450 decision phases. Equation 47 was used only to align discussion phases across conditions; within-G3

451 mechanistic comparisons between pre-consultation discussion and AI consultation retained the  
 452 original phase labels.

### 453 1.16 Dynamic connectivity and hidden Markov modelling

454 This section corresponds to the main-text dynamic-connectivity and neural-fingerprint subsection  
 455 and supplements the full modelling procedure for dynamic connectivity, HMM state estimation and  
 456 neural fingerprints. Dynamic connectivity was defined as the temporal trajectory of hyperbrain edge  
 457 weights across consecutive sliding windows. The window length was  $L = 30$  s, step size was  $\Delta = 3$   
 458 s and the window function was a Hann window  $h(\cdot)$ . For an epoch of duration  $d_e$ , the number of  
 459 available windows was

$$460 \quad W_e = \left\lfloor \frac{d_e - L}{\Delta} \right\rfloor + 1, \quad d_e \geq L. \quad (48)$$

461 In implementation, actual timestamps were used to determine window boundaries, and second-level  
 462 windows were mapped to sample points according to the sampling rate.

463 Within window  $w$ , ROI time series were weighted by the window function:

$$464 \quad x_{g,m,k,e}^{(w)}(t) = h(t - \tau_w)x_{g,m,k,e}(t), \quad (49)$$

465 where  $\tau_w$  is the window centre. Window-level Fisher- $z$  inter-brain connectivity matrices  $\mathbf{Z}_{g,e,w}^{mn}$  were  
 466 then calculated using the same formulae as in Section 1.13. The connectivity matrices for the three  
 467 member pairs were vectorised and concatenated in a fixed order into a 147-dimensional vector:

$$468 \quad \mathbf{v}_{g,e,w} = \left[ \text{vec} \left( \mathbf{Z}_{g,e,w}^{AS} \right); \text{vec} \left( \mathbf{Z}_{g,e,w}^{AE} \right); \text{vec} \left( \mathbf{Z}_{g,e,w}^{SE} \right) \right] \in \mathbb{R}^{147}. \quad (50)$$

469 Equations 48–50 define the sliding-window observations. Here  $\text{vec}(\cdot)$  denotes vectorisation using  
 470 a fixed ROI order. Across all available epochs, this procedure yielded  $Q = 370$  continuous epoch  
 471 segments and  $N = 22,256$  windows.

472 To reduce instability in high-dimensional covariance estimation, window vectors were first centred  
 473 at the edge level:

$$474 \quad \tilde{\mathbf{v}}_\ell = \mathbf{v}_\ell - \bar{\mathbf{v}}, \quad \ell = 1, \dots, N, \quad (51)$$

475 where  $\bar{\mathbf{v}}$  is the mean connectivity vector across all windows. Principal component analysis was then  
 476 performed using full singular-value decomposition:

$$477 \quad \mathbf{u}_\ell = \mathbf{P}_d^\top \tilde{\mathbf{v}}_\ell, \quad \mathbf{u}_\ell \in \mathbb{R}^d. \quad (52)$$

478 Equations 51 and 52 define edge-wise centring and PCA reduction.  $\mathbf{P}_d \in \mathbb{R}^{147 \times d}$  is the loading  
 479 matrix of the first  $d$  principal components. We retained  $d = 87$  components, which explained 90.1%  
 480 of the variance.

481 The HMM represented each window’s low-dimensional connectivity pattern as a Gaussian  
 482 emission from a discrete latent state. For continuous segment  $q$ , let its observation sequence be

483  $\mathbf{U}^{(q)} = (\mathbf{u}_{q,1}, \dots, \mathbf{u}_{q,N_q})$  and its latent state sequence be  $\mathbf{s}^{(q)} = (s_{q,1}, \dots, s_{q,N_q})$ . Given state number  
 484  $K$ , the model is

$$485 \quad P(s_{q,1} = k) = \pi_k, \quad (53)$$

$$486 \quad P(s_{q,\ell} = b \mid s_{q,\ell-1} = a) = A_{ab}, \quad (54)$$

$$487 \quad \mathbf{u}_{q,\ell} \mid s_{q,\ell} = k \sim \mathcal{N}(\boldsymbol{\mu}_k, \boldsymbol{\Sigma}_k), \quad (55)$$

488 where  $\boldsymbol{\pi}$  is the initial state distribution,  $\mathbf{A}$  is the state-transition matrix, and  $\boldsymbol{\mu}_k$  and  $\boldsymbol{\Sigma}_k$  are the  
 489 mean vector and full covariance matrix of state  $k$ . The joint likelihood for one segment is

$$490 \quad p(\mathbf{U}^{(q)}, \mathbf{s}^{(q)} \mid \theta_K) = \pi_{s_{q,1}} \mathcal{N}(\mathbf{u}_{q,1}; \boldsymbol{\mu}_{s_{q,1}}, \boldsymbol{\Sigma}_{s_{q,1}}) \prod_{\ell=2}^{N_q} A_{s_{q,\ell-1}s_{q,\ell}} \mathcal{N}(\mathbf{u}_{q,\ell}; \boldsymbol{\mu}_{s_{q,\ell}}, \boldsymbol{\Sigma}_{s_{q,\ell}}), \quad (56)$$

491 and the full-data likelihood is the product of the likelihoods of the 370 segments. Let  $\mathbf{U}$  denote the  
 492 collection of all segment observation sequences. Models were fitted for  $K = 2, \dots, 7$ , with 10 random  
 493 initialisations and 200 expectation-maximisation iterations for each candidate  $K$ . The state number  
 494 was determined from the Bayesian information criterion curve and model parsimony:

$$495 \quad \text{BIC}(K) = -2 \ln \hat{L}(K) + n_{\text{param}}(K) \ln N, \quad (57)$$

496 where  $\hat{L}(K)$  is the maximum likelihood for the model with  $K$  states and  $N = 22,256$  is the number  
 497 of windows. The number of free parameters in a full-covariance HMM is

$$498 \quad n_{\text{param}}(K) = (K - 1) + K(K - 1) + K \left[ d + \frac{d(d + 1)}{2} \right], \quad (58)$$

499 corresponding respectively to the initial distribution, transition matrix, state means and state  
 500 covariance matrices. The most likely state sequence was decoded using the Viterbi algorithm:

$$501 \quad \hat{\mathbf{s}} = \arg \max_{\mathbf{s}} p(\mathbf{s} \mid \mathbf{U}, \hat{\theta}_K). \quad (59)$$

502 Equations 53–59 specify the HMM emission, likelihood, model selection and decoding steps. For each  
 503 candidate  $K$ , the analysis used 10 seeded random initialisations, retained the maximum-likelihood fit  
 504 across starts and archived the selected model outputs, including decoded state sequences, transition  
 505 probabilities, state means in both PCA and original edge space, PCA loadings, fractional occupancy,  
 506 mean dwell time, switching rates and model-level transition entropy. The absolute BIC was lowest  
 507 at  $K = 6$ , but the improvement from  $K = 5$  to  $K = 6$  was small relative to earlier decreases and  
 508  $K = 7$  rebounded; we therefore report the HMM choice as an elbow-and-parsimony selection rather  
 509 than as a strict minimum-BIC rule. The numerical selection trail is summarised in Supplementary  
 510 Table 3 and visualised in Supplementary Fig. 1.

511 We refer to recurrent state-specific connectivity patterns in the HMM as neural fingerprints.  
 512 The term has a precise mathematical definition in the model: the neural fingerprint of state  $k$  is

513 the vector obtained by back-projecting its Gaussian emission mean in PCA space to the original  
 514 147-dimensional inter-brain connectivity space:

$$515 \quad \mathbf{f}_k = \bar{\mathbf{v}} + \mathbf{P}_d \boldsymbol{\mu}_k, \quad \mathbf{f}_k \in \mathbb{R}^{147}. \quad (60)$$

516 Each element of Eq. 60 corresponds to a fixed member-pair by ROI-pair inter-brain edge. Thus,  $\mathbf{f}_k$   
 517 can be reorganised into three  $7 \times 7$  member-pair connectivity matrices to interpret the hyperbrain  
 518 topology of different states.

519 After state decoding, let  $\mathcal{L}_a$  be the window-index set for any analysis unit  $a$ , such as condition,  
 520 phase or triad, and let  $\mathcal{T}_a = \{\ell : \ell \in \mathcal{L}_a, \ell - 1 \in \mathcal{L}_a\}$  be the set of adjacent transition indices. The  
 521 fractional occupancy of state  $k$  is

$$522 \quad \text{FO}_{a,k} = \frac{1}{|\mathcal{L}_a|} \sum_{\ell \in \mathcal{L}_a} \mathbb{I}(\hat{s}_\ell = k). \quad (61)$$

523 Let  $\mathcal{R}_{a,k}$  be the set of continuous dwell segments of state  $k$  in analysis unit  $a$ , and let  $n_r^{\text{run}}$  be the  
 524 number of windows in dwell segment  $r$ . Mean dwell time is

$$525 \quad \text{MDT}_{a,k} = \Delta \cdot \frac{1}{|\mathcal{R}_{a,k}|} \sum_{r \in \mathcal{R}_{a,k}} n_r^{\text{run}}. \quad (62)$$

526 Overall switching rate is

$$527 \quad \text{SR}_a = \frac{1}{|\mathcal{T}_a|} \sum_{\ell \in \mathcal{T}_a} \mathbb{I}(\hat{s}_\ell \neq \hat{s}_{\ell-1}). \quad (63)$$

528 The fitted transition matrix also provided a model-level transition-entropy summary:

$$529 \quad \text{TE}_{\text{model}} = - \sum_{p=1}^K \sum_{q=1}^K A_{pq} \log_2(A_{pq} + \varepsilon), \quad (64)$$

530 where  $\varepsilon$  is a small positive constant used to avoid  $\log 0$ . Equations 61–64 define the dynamic-state  
 531 summary metrics used in the Supplementary tables and figures. FO describes state occupancy, MDT  
 532 describes stable duration, SR describes switching frequency and  $\text{TE}_{\text{model}}$  describes uncertainty in  
 533 the fitted state-transition matrix. Together, these metrics characterise the dynamic organisation of  
 534 neural fingerprints reported in the main text.

### 535 **1.17 Statistical analysis pipeline, behavioural convergence and neural-behavioural** 536 **association**

537 This section corresponds to the statistical-analysis overview in the main text and supplements  
 538 the concrete formulae for behavioural convergence and neural-behavioural association. The corre-  
 539 spondence between main-text statistical components and the statistical parts of the Supplementary  
 540 Information is shown in Supplementary Methods Table M6.

541 **Supplementary Methods Table M6. Main-text statistical components and their Supplementary**  
542 **Information locations.**

| Main-text component                                         | statistical | Supplementary location | Supplementary content                                                                                                        |
|-------------------------------------------------------------|-------------|------------------------|------------------------------------------------------------------------------------------------------------------------------|
| Analysis units and overall principles                       |             | Section 1.17           | Triad as primary inference unit, round/epoch as repeated observation, two-sided tests and FDR principles.                    |
| Behavioural trajectory and convergence speed                |             | Section 1.17           | Team-by-round behavioural table, convergence slope, final performance and dispersion.                                        |
| Static hyperbrain synchrony                                 |             | Section 1.18           | Linear mixed-effects models for Pearson GS and WTC GS, duration covariate, non-parametric robustness tests and effect sizes. |
| 543 Homologous/complementary connection categories          |             | Section 1.18           | Condition $\times$ connection-type mixed model.                                                                              |
| Dynamic neural-fingerprint summaries                        |             | Sections 1.16 and 1.18 | HMM modelling, state metrics, condition/phase-level fractional occupancy and model-level transition summaries.               |
| Cognitive-alignment and cognitive-offloading mechanism test |             | Section 1.18           | Within-G3 pre-consultation–AI consultation paired comparison, inter-brain/within-brain DLPFC metrics and robustness tests.   |
| Neural–behavioural association and mediation analysis       |             | Section 1.17           | Synchrony–convergence correlation, AI $\rightarrow$ synchrony $\rightarrow$ convergence mediation path and Sobel test.       |
| Surrogate controls and multiple comparisons                 |             | Section 1.19           | Phase randomisation, cross-group random pairing, time shifting, empirical $P$ values, $z$ scores and BH-FDR.                 |

544 All statistical analyses used the three-person team as the primary inference unit. Statistical  
545 notation was defined as

$$546 \quad q = 1, \dots, 32, \quad C_q \in \{G0, G1, G2, G3\}, \quad \mathcal{C}^+ = \{G1, G2, G3\}, \quad r = 1, \dots, 5, \quad \tilde{r} = r - \bar{r}, \quad (65)$$

547 where  $q$  denotes team,  $C_q$  denotes experimental condition,  $\mathcal{C}^+$  denotes the non-reference feedback  
548 conditions,  $r$  denotes round and  $\tilde{r}$  denotes centred round. Behavioural total scores were first  
549 harmonised from role-side records to the team-by-round level:

$$550 \quad Y_{q,r} = \frac{1}{|\mathcal{A}_{q,r}|} \sum_{a \in \mathcal{A}_{q,r}} Y_{q,r,a}, \quad (66)$$

551 where  $\mathcal{A}_{q,r}$  is the set of available role-side records for the same team and round. Equations 65 and  
552 66 define the team-level behavioural analysis unit. When the three role-side records corresponded to

553 the same jointly submitted solution, this average was used only to remove duplicate records and did  
 554 not represent independent ratings by the three members.

555 Each team’s convergence speed was defined as the ordinary-least-squares slope of round scores:

$$556 \quad Y_{q,r} = \alpha_q + s_q r + \epsilon_{q,r}, \quad (67)$$

557 where  $s_q$  is the behavioural convergence slope of team  $q$ . Equation 67 underlies the behavioural slope  
 558 values reported in Supplementary Table 1. Behavioural results report four main quantities: condition-  
 559 wise round-mean trajectories, final-round performance, mean convergence slope and between-team  
 560 dispersion. These summaries are the descriptive basis for the behavioural panels in the main text  
 561 and are not duplicated elsewhere in the Supplementary Information. Sub-scores are used only to  
 562 describe solution-quality composition and are not primary inferential outcomes.

563 Neural-behavioural association was analysed at the team level. Let  $\bar{M}_q$  denote the team-level  
 564 synchrony averaged across discussion-equivalent epochs, such as Pearson GS or WTC GS. The  
 565 association between synchrony and convergence speed was reported as Spearman rank correlation:

$$566 \quad \rho_{\text{SB}} = \text{corr}_{\text{Spearman}}(\bar{M}_q, s_q). \quad (68)$$

567 Spearman correlation was the primary report because the sample size was the number of teams and  
 568 the slope distribution could deviate from normality. Pearson correlation was used as a directional  
 569 check.

570 Mediation analysis tested whether the paths among AI condition, inter-brain synchrony and  
 571 behavioural convergence were consistent with an interpretation in which synchrony served as an  
 572 intermediate process. Let

$$573 \quad X_q = \mathbb{I}(C_q = \text{G3}). \quad (69)$$

574 The three regression paths were

$$575 \quad \bar{M}_q = \alpha_M + aX_q + \eta_q, \quad (70)$$

$$576 \quad s_q = \alpha_Y + cX_q + \xi_q, \quad (71)$$

$$577 \quad s_q = \alpha'_Y + c'X_q + b\bar{M}_q + \zeta_q. \quad (72)$$

578 The indirect effect was defined as  $\hat{a}\hat{b}$ , and the Sobel statistic was

$$579 \quad z_{\text{Sobel}} = \frac{\hat{a}\hat{b}}{\sqrt{\hat{b}^2\text{SE}(\hat{a})^2 + \hat{a}^2\text{SE}(\hat{b})^2}}. \quad (73)$$

580 Equations 69–73 define the mediation analysis. The behavioural-convergence, synchrony-slope and  
 581 mediation analyses used an archived aligned team-by-round analysis table and archived inferential  
 582 summaries. The corresponding synchrony-convergence, mediation, DLPFC and feedback-phase  
 583 estimates are collated in Supplementary Table 2. Because the analysis unit was the team, statistical

584 power was limited. Mediation results were therefore interpreted as mechanism-consistency evidence  
 585 rather than confirmatory causal evidence.

### 586 1.18 Inferential statistical models and effect sizes

587 This section corresponds to the static network inference, connection-category analysis, dynamic-  
 588 state summary and within-G3 mechanistic tests reported in the main text. The corresponding  
 589 numerical estimates are reported in Supplementary Tables 2 and 3, with robustness and surrogate-  
 590 control summaries in Supplementary Table 4. All linear mixed-effects models used a team random  
 591 intercept to account for repeated observations across rounds or epochs within the same team.  
 592 Linear mixed-effects models were fitted with `statsmodels.formula.api.mixedlm` using restricted  
 593 maximum likelihood; Kruskal–Wallis and pairwise non-parametric summaries used Pingouin/SciPy  
 594 functions; rank correlations and paired tests used SciPy functions. The models used G0 as the  
 595 no-feedback reference condition and centred round at round 3. Primary reported  $P$  values are  
 596 two-sided, with a significance threshold of  $\alpha = 0.05$ ; the one-sided Wilcoxon check is explicitly  
 597 treated as a directional robustness check for the offloading prediction.

598 The primary model for static hyperbrain synchrony was

$$599 \quad M_{q,r} = \beta_0 + \sum_{c \in \mathcal{C}^+} \beta_c \mathbb{I}(C_q = c) + \beta_r \tilde{r} + \sum_{c \in \mathcal{C}^+} \beta_{cr} \mathbb{I}(C_q = c) \tilde{r} + u_q + \epsilon_{q,r}, \quad (74)$$

600 where  $M_{q,r}$  can be Pearson GS or WTC GS in the discussion-equivalent phase,  $u_q \sim \mathcal{N}(0, \sigma_u^2)$  is the  
 601 team random intercept and  $\epsilon_{q,r}$  is the residual. G0 was the reference condition. Thus,  $\beta_{G3}$  represents  
 602 the main effect of the AI-assisted group relative to the no-feedback group, and  $\beta_{G3,r}$  represents the  
 603 round-slope difference of the AI-assisted group relative to the no-feedback group.

604 To control residual differences in epoch duration, a sensitivity model added log duration:

$$605 \quad M_{q,r} = \beta_0 + \sum_{c \in \mathcal{C}^+} \beta_c \mathbb{I}(C_q = c) + \beta_r \tilde{r} + \sum_{c \in \mathcal{C}^+} \beta_{cr} \mathbb{I}(C_q = c) \tilde{r} + \gamma \log(d_{q,r}) + u_q + \epsilon_{q,r}, \quad (75)$$

606 where  $d_{q,r}$  is the duration of the corresponding discussion-equivalent phase. Equations 74 and 75  
 607 define the primary mixed-effects model and its duration-adjusted sensitivity model.

608 As a robustness test with weaker distributional assumptions, discussion-equivalent synchrony  
 609 was first averaged across rounds within each team, followed by a Kruskal–Wallis test:

$$610 \quad H = \text{KW} \left( \bar{M}_q \mid C_q \right). \quad (76)$$

611 When the omnibus test suggested group differences, pairwise comparisons between conditions were  
 612 performed and controlled using the Benjamini–Hochberg false-discovery-rate method.

613 The connection-category model tested whether synchrony enhancement was specific to homologous  
 614 or complementary inter-brain edges. Let  $h \in \{\text{H}, \text{C}\}$  denote connection type and  $M_{q,r,h}$  the

615 corresponding strength. The model was

$$\begin{aligned}
 616 \quad M_{q,r,h} &= \beta_0 + \sum_{c \in \mathcal{C}^+} \beta_c \mathbb{I}(C_q = c) + \beta_h \mathbb{I}(h = \mathbf{H}) + \sum_{c \in \mathcal{C}^+} \beta_{ch} \mathbb{I}(C_q = c) \mathbb{I}(h = \mathbf{H}) \\
 617 \quad &+ \beta_r \tilde{r} + u_q + \epsilon_{q,r,h}. \tag{77}
 \end{aligned}$$

618 The key test in Eq. 77 was  $\beta_{ch}$ , the condition  $\times$  connection-type interaction. A non-significant  
 619 interaction did not support preferential concentration of the condition effect in homologous or  
 620 complementary connections.

621 Inference on dynamic neural fingerprints proceeded in two steps. The first step was unsupervised  
 622 HMM model selection and Viterbi decoding as described in Section 1.16, with state number  
 623 determined by the BIC curve and model parsimony. The second step summarised the decoded state  
 624 sequence into fractional occupancy, mean dwell time and switching rate at the team, condition or  
 625 phase level; model-level transition entropy was reported as a descriptive property of the fitted HMM  
 626 transition matrix. Because HMM states are latent dynamic patterns estimated jointly from all  
 627 windows, the main text reports state-number selection, state stability and condition/phase-specific  
 628 occupancy profiles. These results are interpreted as features of dynamic organisation rather than  
 629 significance tests treating edges or windows as independent samples.

630 Within-G3 mechanistic tests compared pre-consultation discussion with AI consultation. For  
 631 inter-brain DLPFC synchrony, let

$$632 \quad D_{q,r}^{\text{inter}} = \text{IBS}_{q,r,\text{AI}}^{\text{DLPFC}} - \text{IBS}_{q,r,\text{pre}}^{\text{DLPFC}}. \tag{78}$$

633 For within-brain DLPFC load, member and phase observations were first standardised within each  
 634 team, and the AI consultation minus pre-consultation difference was then computed:

$$635 \quad D_{q,r}^{\text{intra}} = \tilde{L}_{q,r,\text{AI}}^{\text{DLPFC}} - \tilde{L}_{q,r,\text{pre}}^{\text{DLPFC}}. \tag{79}$$

636 The paired  $t$ -test statistic was

$$637 \quad t = \frac{\bar{D}}{s_D/\sqrt{n}}, \quad d_z = \frac{\bar{D}}{s_D}, \tag{80}$$

638 where  $D$  denotes the paired difference,  $s_D$  its standard deviation and  $d_z$  Cohen’s  $d$  for a paired  
 639 design. Within-brain load also used a one-sided Wilcoxon signed-rank test as a directional robustness  
 640 check for the offloading prediction  $D_{q,r}^{\text{intra}} < 0$ . The dissociation between inter-brain and within-brain  
 641 changes was further evaluated by

$$642 \quad \rho_\Delta = \text{corr}(D^{\text{inter}}, D^{\text{intra}}). \tag{81}$$

643 Equations 78–81 define the within-G3 DLPFC dissociation tests. If inter-brain enhancement was  
 644 not correlated with within-brain reduction, the simple offloading account was not supported.

645 Effect sizes for independent-group contrasts are reported as Cohen’s  $d$ :

$$646 \quad d = \frac{\bar{M}_1 - \bar{M}_0}{\sqrt{\frac{(n_1-1)s_1^2 + (n_0-1)s_0^2}{n_1+n_0-2}}}, \quad (82)$$

647 where  $\bar{M}_1$  and  $\bar{M}_0$  are team-level means of the two groups. Equation 82 was used for independent-  
648 group contrasts, paired comparisons use  $d_z$ , and correlation analyses report  $\rho$ .

### 649 1.19 Surrogate controls, multiple comparisons and reporting rules

650 This section corresponds to the surrogate-control and multiple-comparison descriptions in the  
651 main-text statistical analysis. Surrogate controls were not intended to replace the primary models,  
652 but to compare observed synchrony with null distributions that preserved signal spectral structure,  
653 shared task timing or participant-level signal features.

654 The primary surrogate control was phase randomisation. Phase-randomisation, cross-team  
655 random-pairing, temporal-shift and two-level surrogate summaries were computed as archived  
656 robustness outputs. For each team, member, ROI and epoch, the time series was Fourier transformed,  
657 and phases were randomised while preserving the amplitude spectrum:

$$658 \quad \tilde{X}^{(m)}(f) = |X^{(m)}(f)|e^{i\phi_{\text{rand}}(f)}, \quad \phi_{\text{rand}}(f) \sim \text{Uniform}(0, 2\pi). \quad (83)$$

659 An inverse transform then produced surrogate time series, and synchrony metrics were recomputed.  
660 Each observation was repeated  $B = 1,000$  times, forming the surrogate distribution  $\{M_{\text{surr}}^{(b)}\}_{b=1}^B$ . The  
661 standardised score of the observed value relative to the surrogate distribution was

$$662 \quad z_{\text{surr}} = \frac{M_{\text{true}} - \mu_{\text{surr}}}{\sigma_{\text{surr}}}, \quad (84)$$

663 where  $\mu_{\text{surr}}$  and  $\sigma_{\text{surr}}$  are the mean and standard deviation of the surrogate distribution. The  
664 empirical upper-tail  $P$  value was

$$665 \quad P_{\text{emp}} = \frac{1 + \sum_{b=1}^B \mathbb{I}(M_{\text{surr}}^{(b)} \geq M_{\text{true}})}{B + 1}. \quad (85)$$

666 Equations 83–85 define the phase-randomisation surrogate and its empirical significance test.

667 The second surrogate control was cross-group random pairing. This procedure recombined  
668 members from different real teams into pseudo-triads while preserving role structure, and then  
669 recomputed inter-brain synchrony. This control compared observed G3 synchrony with the random-  
670 pairing null distribution, providing a conservative check on whether participant-level average signal  
671 features alone could account for the observed pattern.

672 The third surrogate control was time shifting. One member’s ROI time series was circularly  
673 shifted by 5–30 s, and inter-brain synchrony was recomputed. This procedure preserves single-  
674 person autocorrelation structure and overall spectral features but disrupts real temporal alignment

675 in interaction. A reduction after time shifting would be consistent with a dependence on real  
676 temporal coupling. Surrogate controls were used to define the interpretive boundaries of synchrony,  
677 not to replace the primary model. Robustness and surrogate-control results are summarised in  
678 Supplementary Table 4; the distributional diagnostics for phase randomisation, time shifting and  
679 cross-team pairing are shown in Supplementary Fig. 2.

680 Multiple comparisons were controlled by analysis family. Predefined primary model parameters  
681 included the G3-versus-G0 main effect on GS, the  $G3 \times \text{round}$  interaction, the within-G3 change in  
682 inter-brain DLPFC synchrony during AI consultation relative to pre-consultation, and the within-  
683 brain DLPFC load change. Exploratory or pairwise condition comparisons used Benjamini–Hochberg  
684 FDR correction with  $q = 0.05$ . The main text reports exact  $P$  values; very small values are reported  
685 as  $P < 0.001$ . All figure error bars and distribution plots use team-level observations, not members,  
686 channels or edges as independent samples.

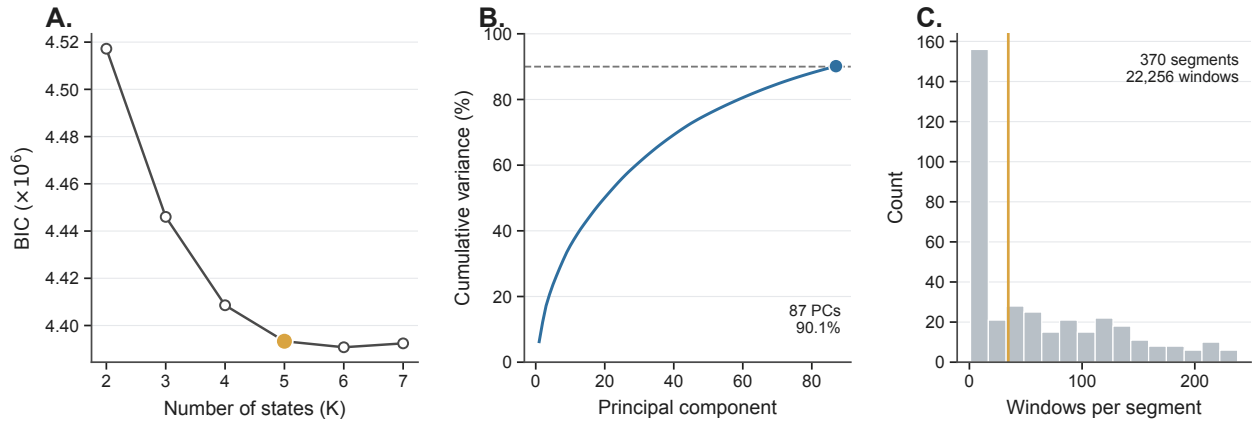

**Supplementary Figure 1:** Hidden Markov model diagnostic summaries. **a**, BIC curve across candidate state numbers. The retained five-state model is highlighted in orange as the elbow-and-parsimony solution, although the six-state model had a marginally lower absolute BIC. **b**, Cumulative PCA variance retained before HMM fitting. **c**, Distribution of segment lengths entering the HMM, expressed as sliding-window counts.

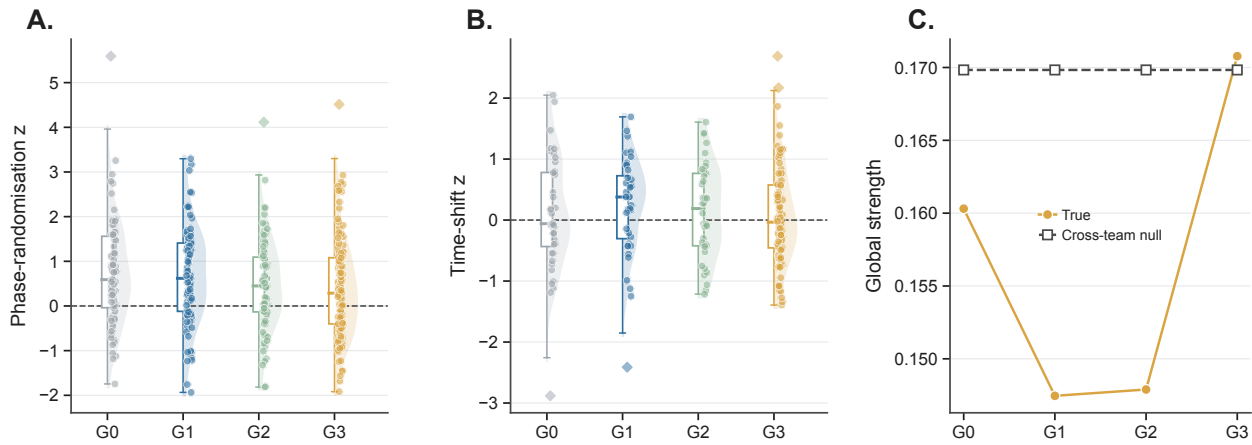

**Supplementary Figure 2:** Surrogate-control diagnostic summaries. **a**, Phase-randomisation  $z$  scores by condition. **b**, Time-shift  $z$  scores by condition. **c**, True condition-level global strength compared with the cross-team random-pairing null. These diagnostics are used to define the interpretive boundaries of synchrony rather than as additional primary endpoints.

**Supplementary Table 1:** Behavioural performance across the four experimental conditions.

| Group | R1   | R2   | R3   | R4   | R5   | Slope | Slope SD |
|-------|------|------|------|------|------|-------|----------|
| G0    | 29.4 | 26.6 | 33.3 | 47.2 | 49.4 | 6.07  | 8.30     |
| G1    | 31.6 | 37.0 | 49.5 | 57.3 | 59.2 | 7.55  | 4.66     |
| G2    | 29.1 | 36.6 | 53.7 | 64.8 | 68.1 | 10.62 | 4.50     |
| G3    | 29.0 | 50.5 | 59.1 | 67.6 | 68.7 | 9.66  | 2.88     |

*Note.* R1–R5 are condition-level means of team total score by round, computed from the team-level behavioural table after harmonising duplicate role-side records. Slope is the ordinary-least-squares score change per round for each team, averaged within condition; Slope SD is the between-team standard deviation of those slopes. Each condition contains eight teams.

**Supplementary Table 2:** Selected inferential results for global synchrony, convergence and DLPFC dissociation.

| Analysis                                        | Contrast or path                                          | Statistic                  | <i>P</i> |
|-------------------------------------------------|-----------------------------------------------------------|----------------------------|----------|
| Pearson global strength                         | G3 relative to G0                                         | $\beta = 0.047, d = 1.79$  | 0.001    |
| Pearson global strength with duration covariate | G3 relative to G0                                         | $\beta = 0.049$            | < 0.001  |
| WTC global strength                             | G3 relative to G0                                         | $\beta = 0.0036, d = 1.98$ | 0.0001   |
| WTC round interaction                           | G3 by round interaction                                   | $\beta = 0.0012$           | 0.0007   |
| Connection-category interaction, Pearson        | Group $\times$ connection type                            | $\beta = 0.0004$           | 0.970    |
| Connection-category interaction, WTC            | Group $\times$ connection type                            | $\beta = 0.0001$           | 0.880    |
| Convergence correlation, Pearson GS             | GS and slope                                              | $\rho = 0.238$             | 0.189    |
| Convergence correlation, WTC GS                 | WTC GS and slope                                          | $\rho = 0.180$             | 0.325    |
| Mediation path <i>a</i>                         | LLM condition $\rightarrow$ synchrony                     | $\beta = 0.043$            | 0.0006   |
| Mediation indirect effect                       | LLM condition $\rightarrow$ synchrony $\rightarrow$ slope | Sobel $z = 0.71$           | 0.478    |
| DLPFC load, offloading check                    | AI minus pre, directional check AI < pre                  | $t = 0.379, d_z = 0.07$    | 0.707    |
| Inter-brain DLPFC, Pearson                      | AI relative to pre                                        | $t = 3.33, d_z = 0.58$     | 0.002    |
| Inter-brain DLPFC, WTC                          | AI relative to pre                                        | $t = 4.39, d_z = 0.76$     | 0.0001   |
| Inter/within DLPFC dissociation                 | Within-change versus inter-change                         | $\rho = 0.030$             | 0.870    |
| Feedback-phase synchrony                        | G2 relative to G3                                         | $U = 12.0, d = 0.70$       | 0.038    |
| G3 feedback relative to discussion              | Feedback relative to pre-consultation                     | $t = 18.52, d_z = 7.29$    | < 0.001  |

*Note.* Mixed-model  $\beta$  estimates are fixed effects with G0 as the no-feedback reference condition unless the contrast states otherwise. Pre denotes the pre-consultation phase. *d* denotes independent-group Cohen's *d*; *d<sub>z</sub>* denotes paired Cohen's *d*; *U* denotes the Mann–Whitney statistic;  $\rho$  denotes Spearman rank correlation. Results are team-level or team-by-round analyses, not member-, channel- or edge-level independent tests.

**Supplementary Table 3:** Summary of hidden Markov model results.

| <b>Metric</b>                              | <b>Value</b>                                                                                                                                                                                                 |
|--------------------------------------------|--------------------------------------------------------------------------------------------------------------------------------------------------------------------------------------------------------------|
| Selected state number                      | $K = 5$ , determined from the BIC curve elbow and model parsimony                                                                                                                                            |
| BIC curve                                  | $K = 2$ : 4,517,200; $K = 3$ : 4,445,997; $K = 4$ : 4,408,575; $K = 5$ : 4,393,339; $K = 6$ : 4,390,795; $K = 7$ : 4,392,437. Marginal improvement decreased markedly after $K = 5$ , and $K = 7$ rebounded. |
| PCA reduction                              | 87 components retained, explaining 90.1% of variance                                                                                                                                                         |
| Total dynamic segments                     | 370                                                                                                                                                                                                          |
| Total windows                              | 22,256                                                                                                                                                                                                       |
| Model-level transition entropy             | 4.491                                                                                                                                                                                                        |
| Self-transition range                      | 0.832–0.872                                                                                                                                                                                                  |
| Dominant discussion state by group         | G0: state 4 (36.3%); G1: state 3 (28.4%); G2: state 1 (31.2%); G3 pre-consultation: state 2 (27.8%)                                                                                                          |
| AI consultation-specific occupancy profile | State 4 = 38.7%; state 0 = 8.2%; state 2 = 18.8%                                                                                                                                                             |

*Note.* HMM inputs were 147-edge sliding-window connectivity vectors reduced to 87 principal components. BIC values are reported for the full-covariance Gaussian HMMs fitted with 10 restarts per  $K$ .  $K = 5$  was retained as an elbow-and-parsimony solution; the lower absolute BIC at  $K = 6$  is reported in the curve so that the selection rule is auditable. State numbers are data-driven labels and should not be read as fixed psychological categories.

**Supplementary Table 4:** Summary of robustness and surrogate-control analyses.

| Analysis                        | Main result                                                                                                                                                           | Interpretive boundary                                                                                                                                                                              |
|---------------------------------|-----------------------------------------------------------------------------------------------------------------------------------------------------------------------|----------------------------------------------------------------------------------------------------------------------------------------------------------------------------------------------------|
| Duration-covariate model        | The G3-versus-G0 Pearson global-strength effect remained significant, $\beta = 0.049$ , $P < 0.001$ ; the log-duration covariate was $\beta = -0.087$ , $P < 0.001$ . | The G3-versus-G0 effect was robust to adjustment for residual epoch-duration differences.                                                                                                          |
| Non-parametric condition test   | Pearson global strength: Kruskal-Wallis $H = 10.78$ , $P = 0.013$ ; WTC global strength: $H = 13.78$ , $P = 0.003$ .                                                  | Condition differences remained observable under tests with weaker distributional assumptions.                                                                                                      |
| Connection-category interaction | In Pearson, the $G3 \times$ homologous interaction was $\beta = 0.0004$ , $P = 0.970$ ; the corresponding WTC interaction was $\beta = 0.0001$ , $P = 0.880$ .        | The LLM effect is not supported as a local enhancement of a specific homologous or complementary edge category.                                                                                    |
| Phase-randomisation control     | Mean team-level surrogate score was $z = 0.212$ , $t = 2.86$ , $P = 0.007$ ; Wilcoxon $P = 0.006$ ; between-group comparison $H = 1.05$ , $P = 0.790$ .               | Observed synchrony was overall higher than a phase-randomised null preserving spectral structure, but this summary does not support attributing surrogate-score differences to a single condition. |
| Cross-team random pairing       | The true G3 mean was 0.1708, the cross-team random-pairing mean was 0.1698, $z = 0.098$ , $P = 0.461$ .                                                               | This conservative control did not show that G3 was higher than the random-pairing null at the group level; the main conclusion does not rely on this surrogate test.                               |
| Time-shift control              | Across 216 discussion epochs, the number of significant time-shift surrogate tests after BH-FDR correction was 0.                                                     | Time-shift results did not add single-epoch FDR-significant support and are used to limit, not strengthen, causal interpretation.                                                                  |

*Note.* Robustness analyses were designed to bound interpretation rather than to create additional primary endpoints. The duration model tests residual epoch-length confounding; non-parametric tests summarise team-averaged condition differences; surrogate controls preserve different nuisance structures while disrupting different forms of coupling. Negative or conservative surrogate findings are retained because they define the limits of the synchrony interpretation.

## 689 References

- 690 [1] Fishburn, F. A., Ludlum, R. S., Vaidya, C. J. & Medvedev, A. V. Temporal derivative  
691 distribution repair (TDDR): a motion correction method for fNIRS. *Neuroimage* **184**, 171–179  
692 (2019). <https://doi.org/10.1016/j.neuroimage.2018.09.025>
- 693 [2] Yang, M. & Wang, J. *Ship Aesthetics and Cabin Design* (in Chinese). Beijing: Science Press

694  
695  
696  
697  
698  
699  
700  
701  
702  
703  
704  
705  
706  
707  
708  
709  
710  
711  
712

(2021). ISBN 9787030673954.

[3] Yang, D. *Research and Design of Ship Cabin Environmental Engineering* (in Chinese). Harbin: Harbin Engineering University Press (2020). ISBN 9787566126450.

[4] Kocsis, L., Herman, P. & Eke, A. The modified Beer–Lambert law revisited. *Phys. Med. Biol.* **51**, N91–N98 (2006). <https://doi.org/10.1088/0031-9155/51/5/N02>

[5] Tzourio-Mazoyer, N. *et al.* Automated anatomical labeling of activations in SPM using a macroscopic anatomical parcellation of the MNI MRI single-subject brain. *Neuroimage* **15**, 273–289 (2002). <https://doi.org/10.1006/nimg.2001.0978>

[6] Rolls, E. T., Huang, C.-C., Lin, C.-P., Feng, J. & Joliot, M. Automated anatomical labelling atlas 3. *Neuroimage* **206**, 116189 (2020). <https://doi.org/10.1016/j.neuroimage.2019.116189>

[7] Singh, A. K., Okamoto, M., Dan, H., Jurcak, V. & Dan, I. Spatial registration of multichannel multi-subject fNIRS data to MNI space without MRI. *Neuroimage* **27**, 842–851 (2005). <https://doi.org/10.1016/j.neuroimage.2005.05.019>

[8] Tsuzuki, D., Jurcak, V., Singh, A. K., Okamoto, M., Watanabe, E. & Dan, I. Virtual spatial registration of stand-alone fNIRS data to MNI space. *Neuroimage* **34**, 1506–1518 (2007). <https://doi.org/10.1016/j.neuroimage.2006.10.043>

[9] Grinsted, A., Moore, J. C. & Jevrejeva, S. Application of the cross wavelet transform and wavelet coherence to geophysical time series. *Nonlinear Process. Geophys.* **11**, 561–566 (2004). <https://doi.org/10.5194/npg-11-561-2004>

## 713 **Appendix A: English Translation of the Participant Recruitment Notice**

714 **Note:** This appendix is a de-identified English translation of the participant recruitment notice.  
715 Direct contact details, registration links, payment-processing information and other identifying  
716 metadata have been removed.

### 717 **Recruitment: Three-person Group Decision-making Experiment on Luxury Cruise** 718 **Cabin Design with fNIRS Brain Imaging**

719 **Compensation:** Participants were compensated according to the ethics-approved study protocol.  
720 If a participant withdrew before completion, compensation was prorated according to completed  
721 participation.

722 **Research unit:** Research team at the School of Mechanical Engineering, Shanghai Jiao Tong  
723 University.

724 **Study title:** Three-person interdisciplinary group decision-making intervention experiment, using a  
725 luxury cruise cabin design task with fNIRS hyperscanning.

726 **Location:** Shanghai Jiao Tong University.

727 **Duration:** Approximately 90–120 minutes per session, including preparation, device setup and  
728 questionnaire completion.

729 **Recruitment target:** 96 participants in total, corresponding to four paradigms, eight groups per  
730 paradigm and three participants per group, for 32 sessions in total.

731 **Payment:** Compensation was provided after participation according to the approved protocol.  
732 Participants who withdrew midway were compensated in proportion to the completed part of the  
733 experiment.

### 734 **1. What Are We Studying?**

735 We compare how different timings and forms of human–AI intervention affect three-person  
736 collaborative design:

- 737 • G0, no intervention: discussion → submission. The system scores the design but does not  
738 display the score to participants.
- 739 • G1, end-of-round feedback: discussion → submission → score interval, viewed silently.
- 740 • G2, end-of-round explanatory feedback: discussion → submission → score interval plus rule  
741 conflicts and trade-off suggestions.
- 742 • G3, three-stage procedure: discussion → AI consultation → submission → score plus rules.

743 Each group completes five rounds and selects a final solution. At the same time, participants wear  
744 fNIRS caps, which use non-invasive near-infrared light, to record brain activity and group synchrony.

745 **2. Who Are We Looking For?**

746 **Basic criteria, all of which must be satisfied:**

- 747 • Senior undergraduate students or master's/doctoral students in relevant majors, aged 18–35  
748 years, Mandarin-speaking, right-handed and right-eye dominant.
- 749 • Participants from the following three disciplinary areas:

750 **1. Ship structural field**

- 751 • Holds or is about to obtain a bachelor's, master's or doctoral degree in engineering mechanics,  
752 naval architecture and ocean engineering, or a related discipline, and has participated in project  
753 design work related to ship cabin design.
- 754 • Has practical experience in structural analysis and design, including use of relevant software  
755 such as SAP2000, ETABS or ANSYS.
- 756 • Has systematically studied the following courses: theoretical mechanics; mechanics of materials;  
757 and at least one of structural mechanics, structural dynamics or principles of structural design.

758 **2. Environmental engineering field**

- 759 • Holds or is about to obtain a bachelor's, master's or doctoral degree in environmental science,  
760 environmental engineering, environmental science and engineering, or a related discipline, and  
761 has participated in project design work related to ship cabin design.
- 762 • Has systematically studied the following courses: principles of environmental engineering; envi-  
763 ronmental monitoring or environmental monitoring experiments; and environmental planning  
764 and management.

765 **3. Aesthetics/design field**

- 766 • Holds or is about to obtain a bachelor's, master's or doctoral degree in environmental design,  
767 art design or a related discipline, and has participated in project design work related to ship  
768 cabin design.
- 769 • Has practical experience in engineering design, including use of design-related software such as  
770 AutoCAD, SketchUp or Adobe Creative Suite.
- 771 • Has systematically studied the following courses: decorative materials and construction; interior  
772 environmental design; and design drafting and perspective.

773 Participants must be willing to wear an fNIRS cap and accept full-session audio recording, which  
774 is used only for behavioural coding and will not be disseminated. Participants should have normal  
775 or corrected-to-normal vision, be able to tie up their hair as required, and be able to remove thick  
776 hats or hair accessories. Participants must sign the informed consent form and privacy statement.  
777 Participants must be right-handed.

778 **Exclusion criteria, any one of which precludes participation:**

- 779 • Scalp inflammation or recent scalp injury, or extremely thick or unmanageable hair that  
780 prevents probe contact.
- 781 • Sensitivity to bright light or screen flicker, self-reported history of epilepsy, or current use of  
782 strong sedative or stimulant medication.
- 783 • A superior–subordinate or intimate relationship with another participant in the same session.
- 784 • Prior participation in the formal experiment or pilot experiment of this study.

785 Each three-person group has fixed roles, with one participant each for structure (S), aesthetics  
786 (A) and environment (E). Groups are formed according to registration information. On arrival, each  
787 participant’s role is consistent with their primary background.

### 788 **3. What Will You Do in the Experiment?**

- 789 • Read the task brief for a luxury cruise cabin design decision scenario and adjust 15 design  
790 control items in a graphical user interface.
- 791 • In each discussion round, speak in the order structure → aesthetics → environment. Each  
792 speaker has no more than 90 seconds. If there is no new opinion, say “pass”. Interruptions are  
793 not allowed.
- 794 • After each speaking cycle, there is a short editing window. Only the operator for the current  
795 round implements the agreed modifications in the interface.
- 796 • Depending on group assignment, participants may see scores, rules, conflict explanations or  
797 trade-off suggestions at the end of each round, or may consult the AI during the round.
- 798 • After five rounds, the final solution is locked. Participants then complete questionnaires,  
799 including TLX, satisfaction/fairness/trust measures, and leave after receiving compensation.

### 800 **4. Schedule and Quotas**

801 There are 32 sessions in total, with three participants per session: G0, 8 sessions and 24  
802 participants; G1, 8 sessions and 24 participants; G2, 8 sessions and 24 participants; G3, 8 sessions  
803 and 24 participants. Morning and afternoon sessions were available. Condition assignment followed  
804 the approved study schedule and balancing requirements.

### 805 **5. Compensation and Withdrawal**

806 Compensation was provided according to the approved protocol after completion. If a participant  
807 withdrew midway, payment was made in proportion to the completed part. Participants arriving  
808 more than 10 minutes late might not be able to participate. Participants were asked to arrive 5–10  
809 minutes early when possible. Participants could withdraw or request a pause at any time.

## 810 **6. Data and Privacy**

811 Data collected include GUI operation logs, rounds and timestamps, audio recordings for tran-  
812 scription and speaking-time statistics, and raw and processed fNIRS indices. Data are stored using  
813 de-identified IDs; the linkage table is encrypted and stored separately. Only authorised research  
814 personnel have access. With separate consent, we may publicly release a de-identified dataset in  
815 an academic repository. Such a dataset will not contain raw audio/video, facial information or  
816 the linkage table. The study was approved by the Shanghai Jiao Tong University Ethics Review  
817 Committee for Science and Technology Research Involving Human Participants, with ethics approval  
818 number I20250750I, and was conducted according to the approved requirements.

## 819 **7. Registration**

820 Registration involved two steps. First, participants completed an online registration and screening  
821 form taking approximately 2–3 minutes. The form collected only information necessary for eligibility  
822 screening and scheduling, including disciplinary background, relevant experience, available time  
823 slots, health and exclusion information, and optional consent preferences. Second, the research  
824 team confirmed eligibility and group assignment. Participants were paired into groups according to  
825 structural, aesthetic and environmental backgrounds and contacted through approved study channels  
826 to confirm the session, location and precautions. Those not selected entered a waiting list.

827 On arrival, participants should bring a valid identity or institutional document required by site  
828 procedures for sign-in and compensation receipt. Participants are advised to wash their hair the  
829 night before the experiment. Clothing and hairstyle should allow cap placement; thick hats or  
830 complex hair accessories should be avoided, and long hair may be tied up.

## 831 **8. Notes**

832 Participants should follow the turn-taking and speaking-time rules throughout the experiment.  
833 During discussion, they may not operate the GUI; only the operator for the current editing window  
834 may do so. Participants may report discomfort at any time, such as cap pressure marks, heat or  
835 fatigue. Large luggage and drinks should not be brought into the experimental area. Mobile phones  
836 should be set to silent mode.

## 837 **9. Organisation and Quota Summary**

838 The paradigms and quotas are: G0–G3, eight groups each; three participants per group; 32  
839 groups and 96 participants in total. Each session lasts 90–120 minutes. Compensation was provided  
840 according to the approved protocol.

## 841 **10. Frequently Asked Questions**

### 842 **Q1. Is fNIRS safe? Does it involve radiation?**

843 fNIRS uses low-intensity near-infrared light. It is non-ionising and non-invasive and is commonly

844 used in human factors and cognitive research. Mild pressure marks or heat may occur, and the  
845 device can be adjusted or the experiment paused at any time.

846 **Q2. Must I know ship design?**

847 Real project experience is not strictly required. Coursework foundations in structure, aesthetics or  
848 environment are sufficient. Relevant background materials will be provided before participation, and  
849 interface operation will be trained on site.

850 **Q3. What if a group member is absent?**

851 A waiting list is maintained. If a replacement cannot be arranged on site, the session will be  
852 rescheduled to the nearest available time.

853 **Q4. Can I choose which paradigm to join?**

854 No. Participants are assigned to one of the paradigms G0–G3 according to the approved study  
855 schedule and balancing requirements.

## 856 **Appendix B: English Translation of the Informed Consent Form**

857 **Note:** This appendix is a de-identified English translation of the informed consent form. Version  
858 metadata, direct contact details, payment-processing details and other identifying metadata have  
859 been removed.

### 860 **Informed Consent Form**

861 **Project title:** Multi-objective collaborative decision-making and human–AI intervention in complex  
862 engineering domains: mechanisms, methods and platform.

863 **Ethics approval number:** I20250750I.

864 **Research institution:** Department of Industrial Engineering and Management, School of Mechani-  
865 cal Engineering, Shanghai Jiao Tong University.

866 **Funding source:** Research on the mechanism and intervention strategies of interdisciplinary group  
867 decision-making in engineering fields based on neurocognitive methods, No. 72271163.

### 868 **1. Study Description: Purpose, Content and Timeline**

869 We are conducting a non-invasive behavioural study on the role of AI advice in team collaboration.  
870 You will be invited to complete a five-round collaborative design task on a computer together with  
871 two other participants. Each round lasts approximately 8–10 minutes. Depending on the condition,  
872 you may receive AI advice in real time, after a round, or not at all. To understand the collaboration  
873 process, we will record dialogue audio for local transcription, operation logs and non-invasive  
874 fNIRS near-infrared brain oxygenation signals. One full participation session lasts approximately  
875 90–120 minutes. The study period is October 2025 to March 2026, and the planned sample size is  
876 approximately 96 participants.

### 877 **2. Research Team and Qualifications**

878 The study is conducted by a research team in the Department of Industrial Engineering and  
879 Management, School of Mechanical Engineering, Shanghai Jiao Tong University. The researchers have  
880 completed training in human participant research ethics, science and technology ethics, and personal  
881 information protection, and have passed relevant operational and safety assessments. Qualification  
882 and training certificates can be provided for inspection when necessary.

### 883 **3. Participation Requirements: Inclusion and Exclusion**

884 Inclusion criteria are: 18–35 years old, right-handed, right-eye dominant, normal hearing and  
885 vision, ability to communicate normally in Chinese, and physical condition sufficient to complete an  
886 indoor task lasting approximately 1.5–2 hours.

887 Exclusion criteria are: obvious discomfort on the day of the experiment; allergy to scalp-contact  
888 materials or intolerance of fNIRS; recent major emotional distress; prior participation in this study;

889 or any other condition judged by the researcher to make participation unsuitable.

#### 890 **4. What Participation Involves and Notes**

891 The procedure is: arrival → screening and consent → device placement → 30-second resting  
892 baseline and 5-minute task-material reading → task demonstration → formal five-round task →  
893 questionnaires and brief interview → data check and compensation.

894 Participants may bring or be provided with a hair band or disposable liner and should maintain  
895 a comfortable sitting posture where possible. If you feel uncomfortable, nervous or involved in a  
896 dispute, you may immediately notify the researcher and pause the experiment. You have the right  
897 to refuse to answer any question or stop any step.

#### 898 **5. Possible Risks and Protections**

899 Possible discomforts or risks include mild scalp pressure marks or heat, short-term tension or  
900 emotional fluctuation, a low-probability risk of privacy leakage, and the possibility that AI advice  
901 may influence the direction of discussion.

902 Protective measures include the following. The equipment is non-invasive and non-ionising.  
903 Devices are strictly disinfected and wearing time is limited, with each session lasting no more than  
904 120 minutes and breaks of 1–2 minutes between rounds. Data are stored in de-identified form, with  
905 identity and code information separated and encrypted. The AI consultation module was operated  
906 through the approved study interface, with usage limits and an emergency stop. If discomfort occurs,  
907 the participant may pause or withdraw at any time, and the event will be recorded and handled.

#### 908 **6. Possible Benefits**

909 Direct benefits include compensation according to the approved protocol, experience with  
910 collaboration and decision-making, and opportunities to improve self-reflection and communication  
911 awareness. Participants may choose to receive a group-level summary of results.

912 Social and academic benefits include contributing to fairer and more efficient methods for  
913 human–AI collaboration, with potential applications in engineering collaboration, education and  
914 training.

#### 915 **7. Voluntary Participation and Withdrawal**

916 Participation is entirely voluntary. You may withdraw at any stage, at any time and for any  
917 reason, and you will not receive unfair treatment or adverse consequences as a result. Upon  
918 withdrawal, identifiable information that has already been generated will be deleted or destroyed.  
919 De-identified data that can no longer identify you may be used for statistical research in accordance  
920 with law. Compensation will be settled according to completed participation under the approved  
921 protocol.

922 **8. Alternatives**

923 If you are unwilling to wear fNIRS, you may decline participation, request rescheduling or receive  
924 only the group-level research summary. These choices do not affect participant rights, and any  
925 compensation followed the approved protocol.

926 **9. Costs, Compensation and Treatment of Research-related Injury**

927 Participation is free of charge. Compensation and any eligible travel reimbursement are provided  
928 according to the approved protocol, with payment records retained as required by institutional  
929 procedures.

930 The study is minimal risk. If unexpected discomfort or harm is caused by the research procedure,  
931 the research team and institution will respond according to institutional procedures and applicable  
932 regulations.

933 **10. Information Use, Confidentiality, Sharing and Secondary Use**

934 Only the minimum information necessary for scheduling and statistical analysis will be collected.  
935 Upon storage, participant identity is replaced with a participant code. The identity-code mapping  
936 table is stored separately and encrypted.

937 Data are used only for the predetermined scientific purposes of this project and for necessary  
938 audit checks, such as inspections by the university, regulators or ethics committee in accordance  
939 with regulations. Publications will present only de-identified group statistics and methods.

940 De-identified data will be stored for five years. The mapping table will be stored until one year  
941 after the end of the study or until audit completion, and then deleted. Upon expiry, materials will be  
942 irreversibly destroyed according to institutional procedures and the destruction will be documented.

943 Identifiable data are not shared externally by default. If future secondary research related to  
944 this topic is proposed, anonymous or de-identified data will be used, and additional ethics approval  
945 and renewed explicit consent will be obtained.

946 **11. Notification of New Information and Re-consent**

947 If new information or protocol revisions arise during the study that may affect your decision  
948 to continue participation, we will inform you promptly and, where necessary, invite you to sign an  
949 updated consent form.

950 **12. Study Time and Number of Participants**

951 The study is planned for October 2025 to March 2026 and will recruit 96 participants, with three  
952 participants per group.

953 **13. Feedback and Publication of Results**

954 Study results will be published in journals, conferences or similar venues. Participants who  
955 subscribe will receive a PDF and link to a group-level result summary by email. No individual  
956 diagnosis or identifiable data will be provided.

957 **14. Biological Samples**

958 The study does not involve collection, storage or external provision of human biological samples.  
959 If biological samples are involved in the future, separate ethics approval and renewed consent will be  
960 obtained.

961 **15. Contact Information**

962 Research, adverse-event, ethics and privacy enquiries were handled through institutionally  
963 approved study contact channels provided to participants during recruitment and consent.

964 **Researcher Statement**

965 “I have fully explained to the research participant the background, purpose, procedures, possible  
966 risks and benefits of this study, allowed sufficient time for the participant to read this consent form,  
967 and answered relevant questions. I have clearly explained that participation is voluntary and that  
968 the participant may withdraw at any time. I have also informed the participant of the research and  
969 ethics contacts. I confirm that I will provide the participant with a signed copy of this consent form.”

970 Researcher signature: \_\_\_\_\_ Date: \_\_\_\_\_ year \_\_\_\_\_ month \_\_\_\_\_ day

971 **Participant Statement**

972 “I have read and understood the above content, and the researcher has answered my questions. I  
973 understand that participation is entirely voluntary and that I may withdraw at any time without  
974 reason and without adverse consequences. I agree to participate in this study as described in this  
975 informed consent form and have received a signed copy of this document.”

976 Participant signature: \_\_\_\_\_ Date: \_\_\_\_\_ year \_\_\_\_\_ month \_\_\_\_\_ day

977 If applicable, legal representative signature: \_\_\_\_\_

978 Relationship to participant: \_\_\_\_\_ Date: \_\_\_\_\_ year \_\_\_\_\_ month \_\_\_\_\_ day

## 979 **Appendix C: English Translation of the Ethics Approval Document**

980 **Note:** This appendix is a de-identified English translation of the ethics approval document. Form  
981 metadata, internal review sequence numbers, personal names, direct committee contact details and  
982 other identifying metadata have been removed.

### 983 **Ethics Review Approval**

984 **Committee:** Shanghai Jiao Tong University Ethics Review Committee for Science and Technology  
985 Research Involving Human Participants.

986 **Document title:** Ethics Review Approval.

987 **Statement:** This ethics review committee is constituted and operates with reference to relevant  
988 national laws and regulations and relevant regulations of Shanghai Jiao Tong University. Its review  
989 and work processes are not influenced by any organisation or individual outside this committee.

990 **Approval number:** I20250750I.

991 **Review location:** Shanghai Jiao Tong University.

992 **Project title:** Research on mechanisms and intervention strategies for interdisciplinary group  
993 decision-making in engineering fields based on neurocognitive methods.

### 994 **Review Documents**

995 1. Application for an ethics project involving human participants in science and technology re-  
996 search, including overview of scientific and technological activities, funding source, commitment  
997 letter and scientific justification.

998 2. Research protocol, including implementation plan, research experience, risk prevention and  
999 control, emergency plan, and form of results release.

1000 3. Informed consent form.

1001 4. Project approval notice.

1002 5. Project plan.

1003 6. Project application.

1004 7. Curriculum vitae of the project leader.

1005 8. Researchers' financial interest statement.

1006 9. Instrument safety certificate.

1007 **Research department:** School of Mechanical Engineering.

1008 **Approved sample size:** The approved sample size covered the analysed sample reported in this  
1009 study.

1010 **Review method:** Expedited review. According to the Measures for Ethical Review of Science and  
1011 Technology (Trial), Guo Ke Fa Jian [2023] No. 167, and this committee’s operating procedures, the  
1012 project meets the category of minimal risk.

### 1013 **Review Opinions**

- 1014 1. The Shanghai Jiao Tong University Ethics Review Committee for Science and Technology  
1015 Research Involving Human Participants reviewed the project and agreed that the project may  
1016 be conducted.
- 1017 2. The committee will conduct annual/periodic follow-up review of the research implementation  
1018 process, with the frequency counted from the date of study approval: 12 months.
- 1019 3. The institutional ethics committee has the right to change the frequency of annual/periodic  
1020 follow-up review according to actual progress.
- 1021 4. The approval is valid for one year from the date of approval.

1022 **Approval record:** The document was signed and stamped by the Shanghai Jiao Tong University  
1023 Ethics Review Committee for Science and Technology Research Involving Human Participants.

### 1024 **Notes**

- 1025 1. The project approved by the committee is a science and technology research activity involving  
1026 human participants. It must be conducted strictly according to the latest approved versions of  
1027 the research protocol and informed consent form, and must comply with relevant domestic  
1028 laws, regulations and guidelines.
- 1029 2. Any content involving export of human genetic resources or requiring special approval by  
1030 relevant departments under national regulations must be reported to the relevant departments  
1031 and approved before implementation. Projects that fall within the list of scientific and  
1032 technological activities requiring ethics review re-examination must obtain approval from the  
1033 re-examination expert group before implementation.
- 1034 3. Collaborative projects should be conducted only after science and technology ethics review or  
1035 written approval by the countries and institutions of all collaborating parties. This approval  
1036 document may be used as a reference for other ethics committees. If there are different opinions  
1037 regarding protocol review, please communicate with this committee in a timely manner.
- 1038 4. Any modifications to approved research protocols, informed consent forms and other materials,  
1039 and any change of principal investigator, must be reported promptly to the institutional ethics  
1040 committee for re-review and may be implemented only after approval.
- 1041 5. Serious adverse events and unexpected events that affect the risk–benefit ratio of the study  
1042 must be reported promptly to the institutional ethics committee.

- 1043 6. According to the committee's opinion on the frequency of annual/periodic follow-up review,  
1044 regardless of whether the study has begun, an application for annual/periodic follow-up review  
1045 must be submitted one month before the annual/periodic follow-up review due date.
- 1046 7. Any non-compliance or protocol violation must be reported promptly to the ethics committee  
1047 for review.
- 1048 8. If the study is suspended or terminated early, the institutional ethics committee must be  
1049 notified promptly.
- 1050 9. Upon completion of the study, a final report must be submitted to the institutional ethics  
1051 committee for review.

1052 **Appendix D: Task Scoring Parameters and Benchmark-Solution Calculation**

1053 This appendix lists the cost, weight and itemised benchmark-solution calculations used in the task  
 1054 scoring function. All values are internal relative units used to keep solution comparisons consistent  
 1055 within the same experimental paradigm; they should not be interpreted as real ship-construction  
 1056 costs or physical weights.

1057 **D.1 Cost and weight mappings**

| Param. | Cost function $c_i(p_i)$                  | Weight function $w_i(p_i)$                |
|--------|-------------------------------------------|-------------------------------------------|
| S1     | $c(0.3) = 80, c(0.6) = 120, c(0.9) = 200$ | $w(0.3) = 150, w(0.6) = 130, w(0.9) = 90$ |
| S2     | $60p_{S2}$                                | $25p_{S2}$                                |
| S3     | $c(0.3) = 30, c(0.6) = 50, c(0.9) = 80$   | $w(0.3) = 30, w(0.6) = 50, w(0.9) = 80$   |
| A1     | $c(0.3) = 40, c(0.6) = 90, c(0.9) = 180$  | $w(0.3) = 20, w(0.6) = 60, w(0.9) = 130$  |
| A2     | $50p_{A2}$                                | $20p_{A2}$                                |
| A3     | $-30p_{A3}$                               | $-40p_{A3}$                               |
| E1     | $c(0.3) = 60, c(0.6) = 100, c(0.9) = 150$ | $w(0.3) = 10, w(0.6) = 20, w(0.9) = 30$   |
| E2     | $c(0.3) = 0, c(0.6) = 20, c(0.9) = 50$    | $w(0.3) = 0, w(0.6) = -5, w(0.9) = -10$   |
| E3     | $c(0.3) = 10, c(0.6) = 25, c(0.9) = 50$   | $w(0.3) = 5, w(0.6) = 10, w(0.9) = 15$    |
| SA1    | $70p_{SA1}$                               | $-8p_{SA1}$                               |
| SA2    | $c(0.3) = 20, c(0.6) = 50, c(0.9) = 100$  | $w(0.3) = 10, w(0.6) = 30, w(0.9) = 60$   |
| SE1    | $c(0.3) = 30, c(0.6) = 60, c(0.9) = 110$  | $w(0.3) = 20, w(0.6) = 40, w(0.9) = 70$   |
| SE2    | $c(0.3) = 20, c(0.6) = 60, c(0.9) = 120$  | $w(0.3) = 15, w(0.6) = 40, w(0.9) = 80$   |
| AE1    | $c(0.3) = 20, c(0.6) = 50, c(0.9) = 90$   | $w(0.3) = 10, w(0.6) = 30, w(0.9) = 60$   |
| AE2    | $c(0.3) = 30, c(0.6) = 60, c(0.9) = 100$  | $w(0.3) = 5, w(0.6) = 10, w(0.9) = 20$    |

1058 **D.2 Cost and weight calculation for the benchmark solution**

| Param. | Value | Meaning                             | Cost  | Weight |
|--------|-------|-------------------------------------|-------|--------|
| S1     | 0.90  | Fibre-reinforced composite          | 200.0 | 90.0   |
| S2     | 0.00  | Compact-column endpoint             | 0.0   | 0.0    |
| S3     | 0.30  | Single-layer integrated panel       | 30.0  | 30.0   |
| A1     | 0.30  | Industrial coating                  | 40.0  | 20.0   |
| A2     | 0.01  | Near the geometric-minimal endpoint | 0.5   | 0.2    |
| A3     | 0.55  | Moderate openness                   | -16.5 | -22.0  |
| E1     | 0.60  | Heat-recovery system                | 100.0 | 20.0   |
| E2     | 0.60  | Mixed recycled material             | 20.0  | -5.0   |
| E3     | 0.90  | Touchless water outlet              | 50.0  | 15.0   |
| SA1    | 0.00  | Porthole-series endpoint            | 0.0   | 0.0    |
| SA2    | 0.30  | Hidden integration                  | 20.0  | 10.0   |
| SE1    | 0.60  | Double-layer insulation             | 60.0  | 40.0   |
| SE2    | 0.90  | Enhanced zoning                     | 120.0 | 80.0   |
| AE1    | 0.60  | Zoned absorption                    | 50.0  | 30.0   |

|              |      |                |              |              |
|--------------|------|----------------|--------------|--------------|
| AE2          | 0.30 | Cool-white LED | 30.0         | 5.0          |
| <b>Total</b> |      |                | <b>704.0</b> | <b>313.2</b> |

1059 **D.3 Domain-score calculation for the benchmark solution**

| Param.                  | Structural contribution | Aesthetic contribution | Environmental contribution |
|-------------------------|-------------------------|------------------------|----------------------------|
| S1                      | 16.20                   | 10.80                  | 1.00                       |
| S2                      | 14.00                   | 0.00                   | 6.00                       |
| S3                      | 4.80                    | 7.00                   | 4.20                       |
| A1                      | 5.60                    | 6.00                   | 7.00                       |
| A2                      | 4.95                    | 0.13                   | 4.95                       |
| A3                      | 3.60                    | 7.70                   | 3.60                       |
| E1                      | 1.60                    | 5.40                   | 7.20                       |
| E2                      | 7.00                    | 3.60                   | 8.40                       |
| E3                      | 0.00                    | 7.00                   | 7.20                       |
| SA1                     | 8.00                    | 0.00                   | 8.00                       |
| SA2                     | 5.60                    | 3.30                   | 3.50                       |
| SE1                     | 6.60                    | 2.80                   | 6.00                       |
| SE2                     | 10.80                   | 0.90                   | 5.40                       |
| AE1                     | 1.60                    | 6.60                   | 3.60                       |
| AE2                     | 0.00                    | 2.70                   | 4.20                       |
| <b>Base score</b>       | <b>90.35</b>            | <b>63.93</b>           | <b>80.25</b>               |
| <b>Conflict penalty</b> | 0.00                    | 0.00                   | 0.00                       |
| <b>Domain score</b>     | <b>90.35</b>            | <b>63.93</b>           | <b>80.25</b>               |

1060 The benchmark solution triggers no second-order conflict penalty, and neither cost nor weight exceeds  
1061 its constraint upper bound. The soft penalty is therefore 0. The total score is

1062 
$$T = \text{clip}_{0,100} \left[ \frac{90.35 + 63.93 + 80.25}{3} \right] = 78.18. \quad (86)$$

1063 **Appendix E: fNIRS Channel MNI Coordinates and ROI Mapping**

1064 This appendix lists the MNI standard-space coordinates of the 26 fNIRS channels, the corresponding  
 1065 AAL3 anatomical regions, Brodmann areas (BAs) and the functional ROIs used in this study.  
 1066 Coordinates are in mm. Positive X indicates right, positive Y indicates anterior and positive Z  
 1067 indicates superior. AAL3 labels were used for anatomical localisation, whereas functional ROIs were  
 1068 used for hyperbrain graph node aggregation in the main text.

| Channel   | X      | Y      | Z      | AAL3 region          | BA          | ROI   |
|-----------|--------|--------|--------|----------------------|-------------|-------|
| Fpz_Fp1   | -14.67 | 86.09  | -4.35  | Frontal_Sup_2_L      | BA 10       | FPA   |
| Fpz_Fp2   | 14.99  | 86.58  | -4.39  | Frontal_Sup_2_R      | BA 10       | FPA   |
| AF7_Fp1   | -42.14 | 76.25  | -8.79  | Frontal_Mid_2_L      | BA 9/46     | DLPFC |
| AF8_Fp2   | 42.80  | 77.28  | -8.92  | Frontal_Mid_2_R      | BA 9/46     | DLPFC |
| Fpz_AFz   | 0.17   | 84.51  | 16.86  | Frontal_Sup_Medial_R | BA 9/10     | mPFC  |
| AF3_Fp1   | -31.57 | 80.38  | 7.12   | Frontal_Sup_2_L      | BA 10       | FPA   |
| AF7_AFF5h | -52.82 | 66.31  | 6.25   | Frontal_Mid_2_L      | BA 9/46     | DLPFC |
| AF3_AFF5h | -42.25 | 70.44  | 22.16  | Frontal_Mid_2_L      | BA 9/46     | DLPFC |
| AF3_AFz   | -16.74 | 78.81  | 28.33  | Frontal_Sup_2_L      | BA 10       | FPA   |
| AF4_AFz   | 17.97  | 79.25  | 28.69  | Frontal_Sup_2_R      | BA 10       | FPA   |
| AF4_AFF6h | 44.05  | 71.40  | 22.41  | Frontal_Mid_2_R      | BA 9/46     | DLPFC |
| AF8_AFF6h | 54.07  | 67.36  | 6.05   | Frontal_Mid_2_R      | BA 9/46     | DLPFC |
| AF4_Fp2   | 32.79  | 81.31  | 7.44   | Frontal_Sup_2_R      | BA 10       | FPA   |
| F3_AFF5h  | -50.52 | 58.58  | 32.64  | Frontal_Mid_2_L      | BA 9/46     | DLPFC |
| F3_F1     | -38.87 | 55.02  | 51.27  | Frontal_Sup_2_L      | BA 10       | FPA   |
| Fz_F1     | -13.60 | 57.72  | 63.40  | Frontal_Sup_2_L      | BA 10       | FPA   |
| Fz_F2     | 14.91  | 58.05  | 63.00  | Frontal_Sup_Medial_R | BA 9/10     | mPFC  |
| F4_F2     | 40.68  | 55.95  | 50.17  | Frontal_Mid_2_R      | BA 9/46     | DLPFC |
| F4_AFF6h  | 52.12  | 59.68  | 31.84  | Frontal_Mid_2_R      | BA 9/46     | DLPFC |
| FTT9h_T7  | -84.14 | -8.93  | -19.57 | Temporal_Mid_L       | BA 21       | MTG   |
| TTP7h_T7  | -84.86 | -23.32 | 0.90   | Temporal_Mid_L       | BA 21       | MTG   |
| FTT9h_FT7 | -82.45 | 6.13   | -20.46 | Temporal_Mid_L       | BA 21       | MTG   |
| FTT7h_C5  | -81.32 | -6.46  | 18.87  | Postcentral_L        | BA 1/2/3    | S1    |
| TTP7h_C5  | -82.92 | -22.20 | 20.16  | SupraMarginal_L      | BA 40       | SMG   |
| FTT7h_T7  | -83.26 | -7.60  | -0.38  | Temporal_Mid_L       | BA 21       | MTG   |
| FTT7h_FT7 | -81.57 | 7.47   | -1.28  | Temporal_Sup_L       | BA 22/41/42 | STG   |
